# **A chimeric Japanese encephalitis vaccine protects against lethal yellow fever virus infection without inducing neutralizing antibodies**

**Running title:** JE vaccine protects against YFV infection

Niraj Mishra<sup>a</sup>, Robbert Boudewijns<sup>a</sup>, Michael A. Schmid<sup>a</sup>, Rafael Elias Marques<sup>a,b</sup>, Sapna Sharma<sup>a</sup>, Johan Neyts<sup>a,#</sup> and Kai Dallmeier<sup>a,#</sup>

<sup>a</sup>KU Leuven Department of Microbiology and Immunology, Rega Institute, Laboratory of Virology and Chemotherapy, Leuven, Belgium

<sup>b</sup>Brazilian Biosciences National Laboratory (LNBio), Brazilian Center for Research in Energy and Materials (CNPEM), Campinas, Sao Paulo, Brazil

## **#Correspondence: co-corresponding authors**

Johan Neyts ([johan.neyts@kuleuven.be](mailto:johan.neyts@kuleuven.be)) and Kai Dallmeier ([kai.dallmeier@kuleuven.be](mailto:kai.dallmeier@kuleuven.be))

## **ADDRESS FOR CORRESPONDENCE:**

KU Leuven Department of Microbiology and Immunology  
Rega Institute

Laboratory of Virology and Chemotherapy  
Herestraat 49 (postbus 1043), B-3000 Leuven, Belgium.

\*Phone : +32 16 37 72 19 or +32 16 32 18 64

Fax : + 32 16 33 73 40

## 1 **ABSTRACT**

2 Recent massive outbreaks of yellow fever virus (YFV) in West Africa and Brazil resulted in rapid  
3 depletion of global vaccine emergency stockpiles and raised concerns about being not prepared against  
4 future YFV epidemics. Here we report that a live-attenuated virus similar to the Japanese encephalitis  
5 virus (JEV) vaccine JE-CVax/Imojev<sup>®</sup> that consists of YFV-17D vaccine from which the structural  
6 (prM/E) genes have been replaced with those of the JEV SA14-14-2 vaccine strain confers full protection  
7 in mice against lethal YFV challenge. In contrast to the YFV-17D mediated protection against YFV, this  
8 protection is not mediated by neutralizing antibodies but correlates with YFV-specific non-neutralizing  
9 antibodies and T cell responses against cell-associated YFV NS1 and other YFV non-structural (NS)  
10 proteins. Our findings reveal the importance of YFV NS proteins to mediate protection and demonstrate  
11 that chimeric flavivirus vaccines, such as Imojev<sup>®</sup> can confer protection against two flaviviruses. This  
12 dual protection has implications for the possible off-label use of JE-CVax in case of emergency and  
13 vaccine shortage during YFV outbreaks. In addition, populations in Asia that have been vaccinated with  
14 Imojev<sup>®</sup> may already be protected against YFV should outbreaks ever occur on that continent as feared  
15 by WHO.

## 16 **IMPORTANCE**

17 Efficient and safe vaccines exist against yellow fever (e.g. YFV-17D) that provide long-lasting protection  
18 by rapidly inducing neutralizing antibody responses. However, vaccine supply cannot cope with an  
19 increasing demand posed by massive urban outbreaks in recent years. Here we report that JE-  
20 CVax/Imojev<sup>®</sup>, a YFV-17D-based chimeric Japanese encephalitis vaccine also efficiently protects  
21 against YFV infection in mice. In case of shortage of the YFV vaccine during yellow fever outbreaks,  
22 (off-label) use of JE-CVax/Imojev<sup>®</sup> may be considered. Moreover, wider use of JE-CVax/Imojev<sup>®</sup> in  
23 Asia may lower the risk of the much-feared YFV spill over to the continent. More in general chimeric  
24 vaccines that combine surface antigens and replication machineries of two distinct flaviviruses can be  
25 considered dual vaccines, for the latter pathogen without induction of surface-specific antibodies.  
26 Following this rationale, novel flavivirus vaccines that do not hold a risk for antibody-dependent  
27 enhancement (ADE) of infection [inherent to current dengue vaccines and dengue vaccine candidates]  
28 could be designed.

## 29 **KEYWORDS**

30 Flavivirus, Chimeric YFV-17D vaccine, Chimeric flavivirus vaccine, Cross-protection, Dual protection,  
31 Antibody-dependent enhancement, Non-neutralizing antibodies, Antibody-dependent cellular  
32 cytotoxicity (ADCC), protective T cell responses, Off-label use of vaccine.

33 Several flaviviruses, such as the yellow fever virus (YFV), Japanese encephalitis virus (JEV), dengue  
34 virus (DENV), Zika virus (ZIKV), West Nile virus (WNV) and tick-borne encephalitis virus are important  
35 human pathogens. Flaviviruses are spread worldwide, though some species show a pronounced  
36 restriction to defined endemic regions, such as YFV to sub-Saharan Africa and tropical Latin America,  
37 or JEV to Southeast Asia and the Asian Pacific. Certain flaviviruses such as DENV, WNV and most  
38 recently ZIKV are (re-)emerging in new areas (1-3). Some evidence suggests the first autochthonous  
39 transmission of JEV in Africa (4).

40 Yellow fever (YF) is an acute viral haemorrhagic disease, which is currently endemic to ~50 countries  
41 with ~1 billion people living at risk of infection. Despite the availability of a highly efficient vaccine (YFV-  
42 17D; e.g. Stamaril®), an estimated ~0.2 million YFV infections with 29,000-60,000 deaths occur annually  
43 (5). Recent YFV outbreaks in Angola (2015/16), the Democratic Republic of the Congo (2016), Brazil  
44 (2017), and Nigeria (2018), and shortage of the YF vaccine supply raised serious concerns about the  
45 preparedness for future outbreaks (6, 7). Since, the *Aedes aegypti* mosquito, the main YFV vector, is  
46 omnipresent in (sub)tropical Asia, YFV spill over to Asia and the establishment of epidemics involving  
47 urban transmission becomes increasingly realistic (8, 9). For JEV, two licensed vaccines are available,  
48 namely Ixiaro® (inactivated vaccine) and JE-CVax (Imojev®: YFV-17D-based chimeric live-attenuated  
49 vaccine; c-LAV) (10, 11). Another YFV-17D-based tetravalent c-LAV, namely against dengue (CYD-  
50 TDV, Dengvaxia®) has reached marketing licensure and is being introduced in some countries/regions.  
51 However, there are serious concerns related to the use of this vaccine, mainly because of aggravation  
52 of dengue disease by pre-existing antibodies (antibody-dependent enhancement, ADE) of DENV  
53 infection (12-14).

54 Vaccination against flaviviruses generally relies on the strategy to mount protective humoral immunity  
55 against structural proteins, in particular neutralizing antibodies (nAbs) elicited against the viral envelope  
56 (E) protein (5, 15); though also CD4<sup>+</sup> T cells seem to contribute to the protective activity of current YFV  
57 vaccines (16). Nonetheless, experimental evidence in mice and non-human primates for YFV (17-20),  
58 and more recently in mice also for WNV (21) and ZIKV (22) clearly shows that also non-structural (NS)  
59 proteins, in particular NS1, can evoke protective humoral and cellular immune responses. Of note, NS1  
60 is not part of the infectious flavivirus particle and thus not target of nAbs. Likewise, immunization with  
61 an adenovirus-vector encoding the NS3 protein of YFV-17D elicited strong CD8<sup>+</sup> T cell responses, which  
62 resulted in some degree of protection in mice against subsequent challenge (23). However, full

63 protection was only observed when the vaccine included the structural proteins of YFV-17D as antigen  
64 as well (23, 24), obviously in line with the accepted role nAb play in YFV infection. Thus, besides humoral  
65 immune responses against the E protein, cellular immune responses against the NS proteins may to  
66 some extent also contribute to the immunity against flaviviruses. However, no flavivirus vaccines have  
67 been developed nor licensed yet for human use that are based on any of these NS proteins as target  
68 antigen. Intriguingly, the genome of chimeric flavivirus vaccines (JE-CVax/Imojev<sup>®</sup> or CYD-  
69 TDV/Dengvaxia<sup>®</sup>) consists of sequences of antigenically distinct flaviviruses (respectively JEV and YFV-  
70 17D, and DENV and YFV-17D) and may therefore exert some dual protective activities. Here we  
71 demonstrate that vaccination of mice with a construct similar to JE-CVax/Imojev<sup>®</sup> provides rapidly  
72 complete protection against a massively lethal YFV challenge, with a single dose being sufficient for full  
73 efficacy. Moreover, we show that this protection is, albeit its unexpected potency, not mediated by nAbs,  
74 but by multiple complementary and vigorous responses directed against the NS proteins of YFV-17D.

## 75 RESULTS

76 **JE-CVax provides full dual protection against lethal JEV and YFV challenge in mice.** JE-CVax is  
77 a c-LAV that consists of the YFV-17D genome, of which the prM and E genes have been replaced by  
78 the corresponding sequences of JEV SA14-14-2. AG129 mice were vaccinated with either  $10^3$  or  $10^4$   
79 PFU of JE-CVax and 28 days later challenged with  $10^3$  PFU [equivalent of 1000 LD<sub>50</sub>] of YFV. This  
80 resulted in, respectively, 80 and 100% survival, while YFV infection was uniformly lethal in all non-  
81 vaccinated controls (Fig. S1A). Therefore, throughout the further study animals were vaccinated and  
82 challenged with  $10^4$  PFU JE-CVax (full survival in vaccinated mice) and  $10^3$  PFU of YFV (full mortality  
83 in non-vaccinated mice), respectively. JE-CVax has originally been developed as a JEV vaccine. As  
84 expected, unlike non-vaccinated animals ( $n = 16$ ), all AG129 mice vaccinated with either JE-CVax ( $10^2$ ,  
85  $10^3$  or  $10^4$  PFU;  $n \leq 6$ ; ) or the inactivated JEV vaccine Ixiaro® ( $n=10$ , 2 times  $\times 1\mu\text{g}$ : twice  $1/6^{\text{th}}$  human  
86 dose) (25) were completely protected ( $p$ -value;  $>0.0001$ ) against lethal JEV challenge (Fig. 1A).  
87 Remarkably, vaccination with JE-CVax resulted also in 97% survival ( $n=35/36$ ) against a massively  
88 lethal YFV challenge (Fig. 1B). All placebo- ( $n=38$ ) or Ixiaro®- vaccinated ( $n=12$ ) animals had to be  
89 euthanized for humane reasons (mean day to euthanasia [MDE];  $14.6 \pm 2.8$  days and  $15.4 \pm 3.5$ ,  $p$ -  
90 value;  $>0.0001$ ). Importantly, JE-CVax also conferred similarly vigorous protection against YFV in  
91 C57BL/6 wild-type (wt) mice ( $n=16$ ) against intracranial (i.c.) challenge with  $10^4$  PFU of YFV (Fig. 1D).  
92 In AG129 mice, a benefit (60% survival) could already be observed 7 days post-vaccination (dpv). At 14  
93 dpv or later all animals were fully protected against lethal challenge (Fig. 1C). To establish that JE-  
94 CVax-mediated protection against YFV is specific and not resulting from some residual cross-reactivity  
95 as previously observed for certain flaviviruses in mice (26), we challenged age-matched non-vaccinated  
96 ( $n=7$ ), or JE-CVax-vaccinated and YFV-17D-challenged ( $n=6$ ) AG129 mice with  $10^4$  PFU of the more  
97 distantly related ZIKV (strain MR766). No protective activity was observed (MDE: non-vaccinated vs.  
98 vaccinated mice;  $23.5 \pm 5.4$  and  $17.4 \pm 8.8$  days,  $p$ -value: 0.4831) (Fig. S1B). Thus, a single-dose  
99 immunization with JE-CVax provides a fast ( $\leq 14$  dpv) and virus-specific protection against lethal YFV  
100 exposure in mice.

101 **JE-CVax mediates protection against YFV without involvement of nAbs.** To explore whether  
102 humoral immunity is involved in JE-CVax-mediated protection against YFV, serum of AG129 mice (i) at  
103 day 0 (pre-vaccinated), (ii) infected with YFV-17D before euthanasia (terminal serum), (iii) vaccinated  
104 with JE-CVax (day 28; post-vaccinated) or (iv) vaccinated with JE-CVax and challenged with YFV-17D

105 (day 56; post-challenge) was analysed for total binding antibodies and nAb. All animals vaccinated with  
106 JE-CVax or Ixiaro<sup>®</sup> seroconverted to JEV. Sera of non-vaccinated animals that had been infected with  
107 YFV-17D showed only some residual reactivity for JEV (as detected by indirect immune fluorescence  
108 assay, IIFA; Fig. S2). By contrast, nAbs against JEV were exclusively detected in serum samples of JE-  
109 CVax- or Ixiaro<sup>®</sup>-vaccinated animals ( $\log_{10}\text{CPENT}_{50}$ :  $2.48 \pm 0.29$  or  $1.86 \pm 0.36$ , respectively) (Fig. 2A).  
110 Only when JE-CVax-vaccinated mice were challenged at a later stage with YFV-17D, nAbs against the  
111 latter virus were raised ( $\log_{10}\text{CPENT}_{50}$ :  $1.66 \pm 0.30$ ) (determined 28d post YFV exposure). Also in serum  
112 of JE-CVax- or Ixiaro<sup>®</sup>-vaccinated C57BL/6 mice, only nAbs against JEV ( $\log_{10}\text{CPENT}_{50}$ :  $1.66 \pm 0.12$  or  
113  $1.61 \pm 0.09$ , respectively) were detectable. Thus, neither JE-CVax nor Ixiaro<sup>®</sup> induce YFV-specific nAbs  
114 in mice.

115 **JE-CVax and YFV-17D induce comparable levels of anti-NS1 YFV antibodies.** From the IIFA  
116 analysis (Fig. S2), it is obvious that sera from JE-CVax-vaccinated mice contain cross-reactive but non-  
117 nAbs against YFV-17D (Fig. 2A). These non-nAbs may possibly be attributed to NS1, a strong B cell  
118 antigen. To assess the presence of anti-YFV NS1 antibodies in JE-CVax-vaccinated AG129 mice, a  
119 direct ELISA was performed on sera from mice vaccinated with  $10^3$ - $10^5$  PFU JE-CVax, or mice infected  
120 with  $10^4$  PFU YFV-17D or  $10^5$  PFU ZIKV-MR766. Serum was obtained either at the onset of disease  
121 (YFV-17D,  $10^5$  PFU JE-CVax and ZIKV) or at 28 dpv. Levels of anti-YFV NS1 antibodies in the different  
122 JE-CVax-vaccinated groups were statistically not different ( $p > 0.05$ ) from the YFV-17D-infected groups  
123 (Fig. 2B). Moreover, very low cross-reactivity was noted for samples from ZIKV-infected mice. These  
124 findings were also confirmed by flow cytometry analysis (Fig. 2C). Serum antibodies from JE-CVax-  
125 vaccinated mice bound to cells that overexpress YFV NS1 as well as to cells that had been infected with  
126 YFV-17D. In fact, serum from JE-CVax-vaccinated mice resulted in a comparable staining as when a  
127 monoclonal antibody [mAb 1A5] specifically directed against YFV NS1 was used (27).

128 **JE-CVax induces YFV-specific antibodies mediating ADCC.** To determine the potential mechanism  
129 that non-nAbs elicit for protection against YFV, an antibody-dependent cellular cytotoxicity (ADCC)  
130 reporter bioassay was carried out using YFV-17D (expressing mCherry) (28) infected HEK293T cells as  
131 target cells and murine Fc $\gamma$ R1IIa expressing Jurkat reporter cells as effector cells (29). Hyperimmune  
132 mouse serum from JE-CVax-vaccinated AG129 mice induced clear ADCC responses and this in a dose-

133 dependent manner, whereas serum from non-vaccinated mice failed to do so (Fig. 3A, 3B and Fig. S3A,  
134 3B).

135 **JE-CVax induces polyfunctional T cell responses against both YFV and JEV antigens.** To assess  
136 whether also cellular immune response against YFV may contribute to the protective activity, ELISpot  
137 assays (TNF- $\alpha$  and/or INF- $\gamma$ ) and intracellular staining of cytokines (TNF- $\alpha$  and INF- $\gamma$ ) were performed  
138 on total splenocytes obtained from AG129 mice (n = 5) and C57BL/6 mice (n = 10) 18- and 4-weeks  
139 after JE-CVax immunization, respectively. Unlike splenocytes of non-vaccinated mice (Fig. S7), robust  
140 and specific INF- $\gamma$  and/or TNF- $\alpha$  production was observed from splenocytes of either mouse strain  
141 vaccinated with JE-CVax (Fig. 4A-C and Fig. S4) after recall with both, an MHC class I-restricted peptide  
142 derived from YFV-17D NS3 or YFV-17D total cellular antigen. In line, flow cytometric analysis revealed  
143 robust and YFV-specific intracellular cytokine production in CD4<sup>+</sup> and CD8<sup>+</sup> T cells from spleens of JE-  
144 CVax-vaccinated AG129 and C57BL/6 mice when stimulated ex vivo with the YFV NS3 peptide or YFV-  
145 17D total cellular antigen (Fig. 4D, Fig. S4-S6). Overall, JE-CVax vaccination induced specific long-  
146 lasting T cell responses against YFV and cellular immunity against YFV was more vigorous when  
147 compared to that elicited against JEV (Fig. 4A-C, Fig. S4-S6). This observation is consistent with YFV  
148 NS proteins serving as more immunogenic T cell antigens than the prM/E of JEV (30, 31).

149 **Both CD4<sup>+</sup> and CD8<sup>+</sup> T cells contribute to JE-CVax-mediated protection against YFV.** To determine  
150 whether YFV-specific T cell responses directly contribute to the JE-CVax-mediated protection against  
151 YFV, T cell depletion experiments were performed in C57BL/6 mice (32). Five-week post-vaccination  
152 animals were administered with anti-mouse CD4 and/or anti-mouse CD8a T cell-depleting antibodies  
153 twice, i.e. two days before and immediately prior to YFV challenge. Unlike for vaccinated (but not further  
154 treated) animals [that were included as immunization controls (n=5) and that survived an intracranial  
155 YFV challenge], in vaccinated but antibody-treated mice the previously observed full protection against  
156 YFV was partially lost by targeting CD4<sup>+</sup> (n=1/8), CD8<sup>+</sup> (n=3/7) and CD4<sup>+</sup>+CD8<sup>+</sup> (n=5/7) T cells for  
157 depletion (Fig. 4E). All non-vaccinated animals (n=5, p-value; 0.0027) succumbed to YFV challenge as  
158 before (Fig. 1D). The mortality resulting from T cell depletion, especially the increased mortality  
159 observed in the double-depleted animal group, suggests that in the absence of nAb both CD4<sup>+</sup> and  
160 CD8<sup>+</sup> T cells contribute to the JE-CVax-mediated protection against YFV in C57BL/6 mice.



## 161 **DISCUSSION**

162 Neutralizing antibodies against the E protein are generally considered as a primary correlate of  
163 protection against flaviviruses (5, 15). However, some preclinical studies suggested that several NS  
164 proteins when used as immunogen for vaccination alone or in combination could induce some degree  
165 of protection in mice and non-human primates against viral challenge (17-20). For instance, a  
166 recombinant vaccinia virus or replication deficient adenoviral vectors expressing YFV-17D NS1, NS2a  
167 and NS2b together or NS3 alone, respectively, resulted in some partial protective immunity against a  
168 lethal challenge of YFV-17D in mice (17, 23). However, full survival could never be achieved and  
169 reached maximally 60-80% versus 100% for YFV-17D vaccinated controls. Similarly, 80% protection  
170 against challenge with the African YFV strain Dakar 1279 was observed in monkeys following repeated  
171 immunization with purified NS1 as sole vaccine antigen and protection correlated with the levels of non-  
172 nAbs against NS1 (19). Conversely, vaccination of mice with E alone (or in combination with NS1 or  
173 NS3) resulted in complete protection (23, 24).

174 The live-attenuated JE-CVax vaccine is a chimeric flavivirus that consist of the genome of YFV-17D  
175 from which the prM/E genes have been replaced by those of JEV SA14-14-2. We, therefore, used JE-  
176 CVax to assess whether it can offer, besides protection against JEV, also protection against YFV  
177 challenge. Since AG129 mice are highly susceptible to lethal JEV SA14-14-2 and YFV-17D infection  
178 (Fig. S8, (28, 33)), we used these two vaccine strains as established surrogates for wt-JEV (33) and wt-  
179 YFV (34, 35), respectively (demanding lower biosafety containment for handling). A single dose of JE-  
180 CVax provided in addition to the expected protection against JEV challenge, a near to complete  
181 protection (35/36) against a massive 1000x-LD<sub>50</sub> challenge with YFV (Fig. 1B). The protective activity  
182 against YFV was raised fast, and a survival benefit could be observed already within 7 days after  
183 vaccination (Fig. 1C). These observations were further corroborated by the fact that vaccination of  
184 immunocompetent C57BL/6 mice with a single dose of JE-CVax provided complete protection (21/21)  
185 against lethal intracranial challenge (17, 23) with YFV (Fig. 1D and Fig 4E). This activity of JE-CVax  
186 was YFV-specific, as AG129 mice that had been vaccinated with Ixiaro® (the inactivated JEV vaccine)  
187 were not protected against lethal YFV challenge. Furthermore, mice that had been vaccinated with JE-  
188 CVax and that later survived YFV challenge did not survive a subsequent lethal challenge with the ZIKV  
189 (Fig. S1).

190 Others have shown in mice that cross-reactive antibodies (together with cross-reactive T cells) may  
191 confer partial protection against flaviviruses from different serocomplexes as demonstrated for JEV (both  
192 Vero cell-derived JEV-P3 strain based inactivated vaccine and JEV SA14-14-2) vaccinated mice  
193 challenged with DENV (26). Likewise, a chimeric Japanese encephalitis/dengue-2 virus experimental  
194 vaccine ChinDENV (originally designed to induce immunity against DENV-2 prM/E) was shown to  
195 protect against both JEV and DENV-2 challenge in mice (31, 36). The protection observed could  
196 however still largely be explained by the induction of considerable levels of E-specific partially cross-  
197 reactive nAbs that neutralized both DENV and JEV. Additionally, the study (31) demonstrated that  
198 vaccination also induces JEV antigen-specific T cell responses (T cells producing IFN- $\gamma$  and IL-2  
199 following stimulation with JEV antigen), suggesting a possible contribution of the cellular immunity in the  
200 defence against JEV challenge in ChinDENV-immunized mice. Another study, in which AG129 and  
201 IFNAR mice were used, reported that during heterotypic dengue virus infection, CD8<sup>+</sup> T-cells provide  
202 some degree of protection in the absence of detectable levels of nAbs (37). However, in this case a mild  
203 (sublethal) DENV-4 infection was used for priming rather than a true vaccine and despite this priming,  
204 only limited (partial) and short-term protection was observed against DENV-2. Moreover, the E-proteins  
205 of DENV-2 and DENV-4 share high (~64%) sequence homology, including conserved T cell epitopes  
206 (38) and therefore, the contribution of the E-protein for protective T cell responses could obviously not  
207 be distinguished from what DENV NS proteins may contribute. By contrast, although we also observed  
208 some residual cross-reactivity for YFV in serum samples of JE-CVax-vaccinated mice (binding antibody  
209 in IIFA, Fig. S2), JE-CVax failed to induce any detectable nAb titers against YFV even following repeated  
210 boosting (Fig. 2A). This finding is in full accordance with the absence of cross-nAbs in mice, monkeys  
211 and humans post JE-CVax or YFV-17D vaccinations (39-41). Therefore, cross-reactivity of serum from  
212 JE-CVax-vaccinated mice could be attributed to (a) induction of E-based broad flavivirus cross-reactive  
213 non-nAbs resulting from flavivirus infection/vaccination (26, 42) and (b) reactivity against YFV-NS1 that  
214 is expressed within and on the surface of infected cells and is target of specific binding but non-nAbs  
215 (20, 43). In fact, we demonstrate equivalent levels of anti-YFV-NS1 antibodies in either JE-CVax-  
216 vaccinated or YFV-17D-infected mice (Fig. 2B-C).

217 Although, we show that JE-CVax immunization resulted in complete protection against YFV-induced  
218 disease, there were variations in the actual levels of anti-YFV nAbs post YFV challenge. In some  
219 animals, no nAbs were detected against YFV post YFV-17D-challenge. This lack of YFV nAb provides

220 strong evidence that JE-CVax even conferred sterilizing immunity in these mice. Since, such protection  
221 cannot be explained by nAb against the YFV-prM/E, it may be accredited to non-nAbs (42-44) and/or  
222 adaptive cellular immunity (16, 30, 32, 45). Some correlation between anti-NS1 antibody levels and the  
223 dose of JE-CVax needed to cause protection was observed (Fig. 2B.C and Fig. S1A) and serum from  
224 JE-CVax-vaccinated mice was found to induce an ADCC response against YFV-17D (Fig. 3 and Fig.  
225 S3). In addition, in our model both CD4<sup>+</sup> and CD8<sup>+</sup> T cells seem (in a likely association with anti-NS1  
226 antibodies) to be involved in JE-CVax-mediated protection against YFV (Fig. 4E). Previously, only  
227 humoral immunity and CD4<sup>+</sup> T (but not CD8<sup>+</sup> T) cells have been implied to be sufficient and required for  
228 protection against YFV (16), with a strong emphasis on nAb as historically established immunological  
229 correlate of protection for YFV (5) and for flaviviruses (such as JEV) in general (1, 15, 39). NABs possibly  
230 block viral spread, whereas cellular immunity efficiently eliminates intracellular viruses either directly, or  
231 targeted by non-nAbs towards infected cells in an Fc-dependent manner (for example, via ADCC  
232 towards cells expressing YFV NS1 on their surface) (18, 21, 43, 44). Indeed, YF-induced CD8<sup>+</sup> T cells  
233 have been shown to act as a 'backup defence' system in the absence of nAbs and to participate in viral  
234 clearance in particular from the CNS in mice (23, 32). Moreover, strong CD8<sup>+</sup> T cell responses are also  
235 detected in the response to human vaccines (30). As we show here, immunization of AG129 and  
236 C57BL/6 mice with JE-CVax elicited protective polyfunctional YFV antigen-specific CD4<sup>+</sup> and CD8<sup>+</sup> T  
237 cell responses (expressing the Th1-type cytokines TNF- $\alpha$  and IFN- $\gamma$ ), which is in line with a previous  
238 study with a chimeric Japanese encephalitis/dengue-2 virus vaccine (31). Collectively, our data suggest  
239 that JE-CVax mediated vigorous protection against lethal YFV challenge depends on the combined  
240 effect of several effector principles, including both the humoral and cellular immune responses, yet  
241 definitely other than nAbs.

242 To assess the efficacy of JE-CVax, we employed mice as *in vivo* model, and the YFV-17D vaccine strain  
243 (16, 17, 23, 44, 46) as challenge virus. This experimental setup implies some constraints. Generally,  
244 mice are not susceptible to human flavivirus infection (47) and the YFV-17D is not virulent in humans  
245 (5). To overcome some of these limitation, we made use of two established, complementary and  
246 stringent mouse infection models that are accepted surrogates for testing of flavivirus vaccines (11); (i)  
247 immunocompromised mice (AG129 mice; (28, 34, 35)) that develop fatal neurotropic infection when  
248 challenged peripherally with YFV-17D, in particular when inoculated with a highly lethal (1000x-LD<sub>50</sub>)  
249 challenge virus dose (Fig. S8, (28)), and (ii) immunocompetent wt mice (C57BL/6; (16, 17, 23)) that can

250 be challenged i.c. with YFV-17D. YFV-17D was originally developed by adapting a viscerotropic clinical  
251 isolate (YFV-Asibi) to replication in mouse brains ('fixed to mouse brain') (48). This vaccine virus can  
252 hence, be considered as a genuine mouse adapted neurotropic and neurovirulent YFV strain. For this  
253 reason, it could also be considered in this study as the challenge virus. Besides experimental  
254 convenience (YFV-17D does not require BSL3 containment), YFV-17D is a widely accepted, i.e. best  
255 characterized and hence most widely used challenge strain in mouse models. Classical i.c. inoculation  
256 of YFV-17D consistently causes fatal disease in mice (46) that cannot be distinguished from that induced  
257 by wt-YFV strains (44, 46) . Also, because JE-CVax expresses the prM/E of JEV that belongs to another  
258 serocomplex than YFV, vaccination and subsequent challenge with YFV-17D compares to a certain  
259 extent to a heterotypic flavivirus vaccination-challenge (as described by others (37)), however with a  
260 markedly more pronounced vaccine efficacy. Therefore, in conclusion, similar mechanisms should hold  
261 when using wild-type YFV as the challenge virus (44, 46). Obviously, before proceeding to clinical use,  
262 this principle should be confirmed in JE-CVax vaccinated non-human primates demonstrating protection  
263 from subsequent challenge with virulent wt-YFV strains.

264 Previous safety and immunogenicity studies of chimeric live-attenuated viruses (JE-CVax and  
265 ChimeriVax-DEN2) in humans indicated that pre-existing immunity to the parental YFV-17D vaccine  
266 virus does not interfere with immunization, but rather induces long-lasting cross-neutralizing antibody  
267 responses (39, 49, 50). Importantly, if our data on the dual protection conferred by c-LAV in mice can  
268 be translated to other species, including humans, this implies that the JE vaccine JE-CVax (and likewise  
269 Imojev<sup>®</sup>) may provide dual protection, i.e. against both JEV and YFV. A dual protective effect may be of  
270 particular relevance in case YFV may one day – as is feared (8, 9) – cause outbreaks in (sub)tropical  
271 Asia. Given the capacity problems with the production of the current YFV vaccine, having another  
272 licensed vaccine (i.e. JE-CVax/Imojev<sup>®</sup>) available as an alternative means to protect against YFV may  
273 at such time help to contain an outbreak. In addition, those already vaccinated with JE-CVax may be  
274 expected to be protected against YFV. A similar principle may apply to other chimeric flavivirus vaccines  
275 that consist of a YFV-17D backbone (such as CYD-TDV/Dengvaxia<sup>®</sup>) (12) and others under  
276 development (such as our recently proposed chimeric YFV-17D/ZIKV vaccine candidate) (28). Likewise,  
277 c-LAVs could be generated against DENV and other viruses that may cause using the backbone of the  
278 parent virus (e.g. DENV) from which the prM/E genes have been replaced by that of antigenically more  
279 distantly related viruses or serotypes. Such approach may avoid potentially harmful nAb responses. The

280 same principle may apply to c-LAV for ZIKV using a ZIKV backbone (51) and prM/E sequences of  
281 another flavivirus that is not shown to cause ADE.

282 To conclude, we demonstrate that JE-CVax efficiently and rapidly induces high cross-protective efficacy  
283 (~100%) in mice against YFV challenge, even with an exceedingly aggressive challenge inoculum. The  
284 study provides evidence that c-LAV flavivirus vaccines may be developed solely based on NS proteins.  
285 Moreover, immunization with a chimeric flavivirus, whereby the prM/E genes of the backbone have been  
286 replaced by that of yet another flavivirus may have a dual protective effect. A vaccine, such as  
287 Imojev®/JE-CVax may thus be suitable for off-label use, namely for protection against YFV, which in  
288 this case is not mediated by nAbs.

## 289 **MATERIALS and METHODS**

290 **Cells and medium.** BHK-21J and Vero E6 cells used in this study were a generous gift from Peter  
291 Bredenbeek, LUMC, NL. Cells were maintained in seeding medium containing MEM Rega-3 medium  
292 (Gibco, Belgium) supplemented with 10% fetal calf serum (FCS, Gibco, Belgium), 2mM glutamine  
293 (Gibco, Belgium) and 0.75% sodium bicarbonate (Gibco, Belgium). HEK 293 (human embryonic kidney  
294 293 cells; ATCC CRL-1573) cells were cultured in DMEM (Gibco, Belgium), containing 10% FCS and  
295 100 units/ml penicillin-streptomycin solution (Pen/Strep, Gibco, Belgium). Virus culture and cytopathic  
296 effect-based virus neutralization assays (CPENT) were performed in assay medium, which is the  
297 seeding medium supplemented with only 2% FCS. HEK 293 cells were transfected with YF-NS1-GFP  
298 using TransIT®-LT1 transfection reagent (Mirus Bio LLC, Belgium), according to the manufacturer's  
299 instructions. Infection of HEK 293 cells with YFV-17D-mCherry (see below) was performed in DMEM  
300 medium supplemented with 2% FCS and 100 units/ml Pen/Strep solution. All cultures were maintained  
301 at 37°C in an atmosphere of 5% CO<sub>2</sub> and 95%–99% humidity.

302 **Virus, vaccines and antigens.** Stamaril® (G5400) and Ixiaro® (JEV16F290) were from Sanofi Pasteur  
303 (France) and Valneva (Austria), respectively. Stamaril® was passaged two times in Vero E6 cells (YFV-  
304 17D-G5400P2), and stored at (-80°C). YFV-17D-G5400P2 was used throughout the study to challenge  
305 mice and is referred to as YFV-17D. YFV-17D-based Japanese encephalitis c-LAV Imojev®  
306 (Chimerivax-JE, JE-CVax) is not available in Europe and was, therefore, retro-engineered according to  
307 publicly available sequence information (52) (Patent Number: WO2006044857A2). To that end, a DNA  
308 fragment encoding the prM and E proteins of JEV vaccine strain SA14-14-2 was custom synthesized  
309 (IDT Integrated DNA Technologies, Haasrode, Belgium) and subcloned into the YFV-17D expression  
310 vector pShuttle-YFV-17D (52) (Patent Number: WO2014174078 A1) of our Plasmid-Launched Live-  
311 Attenuated Vaccine (PLLAV)-YFV-17D platform using standard molecular biology techniques and  
312 thereby replacing the YFV-17D prM/E sequences. Two adaptive mutations in NS2A and NS4B genes  
313 and an additional Kas1 site at the end of the prM/E coding sequence (52) were introduced by site-  
314 directed mutagenesis. To generate JE-CVax virus, BHK 21J cells were transfected with PLLAV-JE-  
315 CVax using TransIT®-LT1 transfection reagent, following the manufacturer's instructions. Upon onset  
316 of CPE, JE-CVax virus was harvested, centrifuged at 4000 rpm at 4°C for 10 minutes, aliquoted and  
317 stored at (-80°C). Similarly, the live-attenuated Japanese encephalitis virus vaccine JEV SA14-14-2  
318 (Genbank AF315119.1) was generated fully synthetically from overlapping DNA fragments (IDT

319 Integrated DNA Technologies, Haasrode, Belgium), assembled by overlap-extension PCR and  
320 subsequent homologous recombination in yeast. The recombinant JE-CVax and JEV SA14-14-2 viruses  
321 were subsequently passaged on Vero E6 cells to generate virus stocks. As an alternative challenge  
322 virus, ZIKV strain MR766 was used (53). Virus titers were determined on BHK-21J cells by plaque  
323 assays (plaque forming units/ml; PFU/ml) and CPE-based assays (TCID<sub>50</sub>/ml) as described below.

324 A YFV-17D reporter virus (YFV-17D-mCherry) was generated that expresses the red-fluorescent protein  
325 mCherry as a translational fusion to the N-terminus of YFV-17D C protein. In brief, using standard PCR  
326 techniques and homologous recombination in yeast a synthetic DNA fragment encoding codons 2-236  
327 of mCherry (Genbank AY678264.1) was inserted in YFV-17D genome (54) immediately downstream of  
328 nucleotide position 181, flanked (i) at its 5' terminus by a glycine-serine linker (BamH1 site), and (ii) at  
329 the 3' end by a *Thosea asigna* virus 2A peptide (EGRGSLTTCGDVEENPG/P) (55) followed by a repeat  
330 of codons 2-21 of YFV-17D C gene, yet with an alternative codon usage to avoid RNA recombination  
331 during viral replication. YFV-17D-mCherry was rescued by transfection of the resulting PLLAV-YFV-  
332 17D-mCherry of BHK 21J as before (28). A full characterization of YFV-17D-mCherry is given elsewhere  
333 (Schmid et al., in preparation).

334 Plasmid pCMV-YFV-17D NS1-IRES-EGFP that drives the mammalian expression of YFV-17D NS1 as  
335 a transcriptional fusion to EGFP was generated by PCR cloning of YFV-17D nt 2381–3508 cDNA  
336 (including an E protein derived N-terminal signal peptide) (56) flanked by a 5' terminal Kozak sequence  
337 and 3' terminal stop codon into the Nhe1 and Sal1 sites of pIRES2-EGFP (Clontech cat # 6029-1).

338 An MHC I class-restricted peptide from YFV-17D non-structural protein 3 (NS3) (sequence ATLTYRML)  
339 (57) was synthesized by Eurogentec (Seraing, Belgium). Total cellular antigen for YFV-17D and JEV  
340 SA14-14-2 was prepared first by infecting Vero E6 cells with 0.1 MOI YFV-17D or JEV SA14-14-2,  
341 respectively. Non-infected Vero E6 cells were used as control. Four days post-infection, cells were  
342 harvested either by trypsinization or by detaching through pipetting, when a cytopathic effect (CPE) was  
343 visible. Following centrifugation, cell pellets were resuspended in PBS and cell lysates were prepared  
344 by four freeze-thaw cycles. Overnight UV-irradiation was performed to inactivate the virus in the cell  
345 lysate preparations and large debris was removed via filtering through 70 µm cell strainers (BD  
346 Biosciences).



347 **Animals, hyper-immune serum, infection and T cell depletions.** Host IFN signalling is the major  
348 barrier to the viscerotropism and for pathogenicity of neurotropic flaviviruses (58). In line, wild-type mice  
349 are poorly susceptible to infection with flaviviruses (28, 59-61) including YFV-17D infection/vaccination  
350 (34, 35, 62). Likewise, type I (IFN- $\alpha/\beta$ ) and type II (IFN- $\gamma$ ) interferon signalling mutually controls YFV-  
351 17D infection. Unlike humans (63, 64), type I IFN (IFN- $\alpha/\beta$ ) can restrict YFV-Asibi as well as YFV-17D  
352 infection in mice (34, 35, 62, 65). Similarly, IFN- $\gamma$  exerts restriction on YFV-17D replication,  
353 dissemination and clearance in mice (35, 66). YFV-17D is neurotropic in wt-mice when directly injected  
354 into the brain (46). In AG129 mice, INF- $\alpha/\beta$  and  $\gamma$  receptors are knocked out, which results in neurotropic  
355 infection following peripheral inoculation of YFV-17D. Therefore, to allow transient replication (and thus  
356 vaccination) of YFV-17D in wt-mice, MAR1-5A3 antibodies were co-administered to block type-1 IFN  
357 signalling into C57BL/6 mice.

358 Immunodeficient interferon (IFN)- $\alpha/\beta$  and - $\gamma$  receptor knockout mice (AG129; B&K Universal, Marshall  
359 Bio resources, UK) were bred in-house. AG129 mice have been shown to be highly susceptible to lethal  
360 YFV-17D infection serving as a well-established surrogate rodent challenge model for wt-YFV infection  
361 (34, 35, 67). Six to eight weeks old male AG129 mice were used for all experiments after random  
362 assignment into different groups. Animals were kept in individually ventilated type-2 filter top cages on  
363 a 12 hour day/night cycle with water and food *ad libitum*. Housing of animals and procedures involving  
364 animal experimentation were conducted in accordance with institutional guidelines approved by the  
365 Ethical Committee of the KU Leuven, Belgium [licenses P168/2012, P103/2015, P140/2016 and  
366 P005/2018]. Throughout the study, animals were vaccinated intraperitoneally (i.p.) with either  $10^4$  plaque  
367 forming units (PFU) of JE-CVax,  $1/6^{\text{th}}$  human doses of Ixiaro® (25) or 2% assay medium. Animals  
368 vaccinated with Ixiaro® were boosted on 14 dpv with  $1/6^{\text{th}}$  human dose of Ixiaro®. All the vaccinated  
369 animals were challenged i.p. with either  $10^3$  PFU of YFV-17D or JEV SA14-14-2 (both corresponding to  
370 1000 LD<sub>50</sub>) 28 dpv, if not stated otherwise. An additional four weeks post YFV-17D challenge, some  
371 animals were re-challenged i.p. with  $10^4$  PFU ZIKV-MR776 (53). Animals were observed for morbidity  
372 (weight loss) and humane endpoint once daily. The humane endpoint is defined as either  
373 paresis/difficulty in walking, paralysis (hind legs/soured eyes), moribundity / ataxia / tremors / difficulty  
374 in breathing, 20% weight loss or quick weight loss (15% within 1 or 2 days) and animals were  
375 immediately euthanized once a humane endpoint was reached. Throughout the study, bleedings were



376 performed through submandibular puncture on day 0 (pre-vaccinated), day 28 (post-vaccinated) and  
377 day 56 (post-challenged).

378 Hyper-immune serum was prepared by vaccinating AG129 mice with  $10^4$  PFU JE-CVax, followed by  
379 two boosts with  $10^5$  PFU JE-CVax in 14-day intervals. Another 14 days after the second booster, animals  
380 were bled twice per week for the following four weeks. All serum batches were then pooled and CPENT  
381 assays for JE-CVax and YFV-17D were performed. We did not observe any YFV nAbs in the  
382 hyperimmune-sera but did see a ~3.6-fold ( $\log_{10}\text{CPENT}_{50}$  titers  $3.03 \pm 0.18$ ) selective increase in  
383 neutralizing titers against JE-CVax compared to single vaccination. (Fig. 3A). Normal mouse control  
384 serum was prepared by pooling serum from 18 non-vaccinated AG129 mice.

385 Immunocompetent wt-C57BL/6J01aHsd i.e. C57BL/6 were purchased from ENVIGO Labs, Netherlands  
386 and were maintained and manipulated as described for AG129 mice with some modifications (23, 28).  
387 Since, flaviviruses do not readily replicate in immunocompetent wild type mice (28), they were  
388 immunized with  $10^4$  PFU JE-CVax in the presence of 2.5 mg of an IFN alpha/beta receptor subunit 1  
389 (IFNAR-1) binding monoclonal antibody, MAR1-5A3, administered i.p. one day prior to immunization.  
390 0.5 mg MAR1-5A3 antibody was also re-administered i.p. on day 4 and day 7 post-vaccination. Animals  
391 were bled 28 days post-vaccination and challenged i.c. with  $10^4$  PFU YFV-17D in 30  $\mu\text{L}$  of volume. A  
392 full characterization of immunogenicity of YFV-17D in various mouse strains is given elsewhere (Ma et  
393 al., in preparation). For T cell depletion studies, C57BL/6 mice were either sham-vaccinated or  
394 vaccinated i.p. with  $1 \times 10^4$  PFU of JE-CVax 35 days prior to i.c. challenge with  $1 \times 10^4$  PFU of YFV-17D.  
395 At day (-2) and day 0 prior to YFV challenge, 0.5 mg of either anti-mouse CD4 (Clone GK1.5, Leinco  
396 Technologies, USA) or anti-mouse CD8a (Clone 53-6.7, Leinco Technologies, USA) or a combination  
397 of both was administered i.p. (32, 68).

398 **Indirect immunofluorescence assay (IIFA).** To determine the seroconversion of animals, all JEV,  
399 YFV, and ZIKV IgG-IIFAs were performed as per the manufacturer's instruction (Euroimmune, Lübeck,  
400 Germany), except for the use of labelled secondary antibody and the mounting agent glycerine, which  
401 were replaced by Alexa Fluor 488 goat anti-mouse IgG (A-11029, ThermoFisher Scientific) and DAPI  
402 (ProLong® Antifade Reagent with DAPI, ThermoFisher Scientific), respectively. Serum from non-  
403 vaccinated animals served as naïve, negative control. Slides were visualized using a fluorescence  
404 microscope (FLoid Cell Imaging Station, ThermoFisher Scientific).

405 **Plaque assay and plaque reduction neutralization test (PRNT).** Viral titers of YFV-17D or JE-CVax  
406 preparations were determined using plaque assays on BHK-21J cells. In brief,  $10^6$  BHK-21J cells per  
407 well were plated in 6-well plates and cultured overnight in seeding medium. Cells were washed with  
408 PBS and inoculated with virus of different dilutions prepared in the assay medium for one hour at room  
409 temperature (RT). Culture supernatants of uninfected cells were used as negative controls. Cells were  
410 thoroughly washed with the assay medium and overlaid with MEM-2X (Gibco, Belgium) supplemented  
411 with 4% FCS and 0.75% sodium bicarbonate containing 0.5% low melting agarose (Invitrogen, USA).  
412 The overlay was allowed to solidify at RT, cells were then cultured for 7 days at 37 °C, fixed with 8%  
413 formaldehyde and stained with methylene blue. Plaques were manually counted and plaque titer was  
414 determined as PFU/ml.

415 Throughout the study, all the virus neutralization assays i.e. PRNT and CPE-based virus neutralization  
416 assay (CPENT) were performed with YFV-17D and JE-CVax. JE-CVax has previously been established  
417 as a safe substitute for JEV, a BSL-3 pathogen, when virus neutralization tests need to be performed in  
418 BSL-2 (69). PRNT assays were performed in a similar way as the plaque assays for viral titration with  
419 some modifications. Briefly, an additional step was added, where different serum dilutions made in the  
420 assay medium were first inoculated with YFV-17D (20-50 PFU) or JE-CVax (50-100 PFU) virus for 1 h  
421 at 37 °C and then added to the cells. All sera were assayed in triplicate in serial dilutions 1:20, 1:66,  
422 1:200, 1:660, 1:2000 and 1:6600. Plaques were manually counted and PRNT<sub>50</sub> were calculated using  
423 the Reed and Muench method (70). Culture-derived YFV-17D or JE-CVax were used as positive virus  
424 controls, while culture supernatants of uninfected cells were used as negative cell control. PRNT<sub>50</sub>  
425 values for each sample represent geometric means of three independent repeats and data presented  
426 as (mean  $\pm$  SD) log<sub>10</sub>PRNT<sub>50</sub>.

427 **Cell-based cytopathic (CPE) assay and CPE-based virus neutralization test (CPENT).** Viral titers  
428 for culture-derived YFV-17D or JE-CVax (TCID<sub>50</sub>) and 50% neutralizing antibody titers (log<sub>10</sub>CPENT<sub>50</sub>)  
429 were determined using cytopathic effect (CPE)-based cell assays and CPE-based virus neutralization  
430 tests (CPENT), respectively, on BHK-21J cells (71) with some modifications. In brief,  $2 \times 10^4$  BHK-21J  
431 cells/well were plated in 96-well plates overnight in seeding medium. The medium was then replaced  
432 with assay medium containing different virus dilutions and cultured for 5 days at 37°C. Later, assays  
433 were first visually scored for CPE and then stained with MTS/Phenazine methosulphate (PMS; Sigma-  
434 Aldrich) solution for 1.5 h at 37 °C in the dark. Post MTS/PMS staining absorbance was measured at

435 498 nm for each well. All assays were performed in six replicates and TCID<sub>50</sub>/ml was determined using  
436 the Reed and Muench method (70).

437 CPENT assays were performed in a similar way as the CPE assays for viral titration with some  
438 modifications. Briefly, an additional step was added, where different serum dilutions made in the assay  
439 medium were first inoculated with 100 TCID<sub>50</sub> YFV-17D or JE-CVax virus for 1 h at 37 °C and then  
440 added to the cells. All sera were assayed in triplicate in serial dilutions 1:20, 1:66, 1:200, 1:660, 1:2000  
441 and 1:6600. CPE neutralization was calculated with the following formula: % neutralization activity = %  
442 CPE reduction =  $(OD_{\text{Virus+Serum}} - OD_{\text{VC}}) * 100 / (OD_{\text{CC}} - OD_{\text{VC}})$  and 50% neutralization titers (CPENT<sub>50</sub>)  
443 were calculated using the Reed and Muench method (70). Culture-derived YFV-17D or JE-CVax were  
444 used as positive virus controls, while culture supernatants of uninfected cells were used as negative cell  
445 control. CPENT<sub>50</sub> values for each sample represent geometric means of three independent repeats and  
446 data presented as (mean ± SD) log<sub>10</sub>CPENT<sub>50</sub>. The CPENT assay for detection of nAbs was validated  
447 against a standard PRNT, yielding a strong correlation ( $R^2 = 0.71$ ;  $p = 0.018$ ) between PRNT<sub>50</sub> and  
448 CPENT<sub>50</sub> (Fig. S9A) and similar levels of anti-JEV nAbs titers in post-vaccination and post-challenge  
449 serum samples (Fig. S9B, 9C).

450 **Enzyme-linked immunosorbent assay (ELISA).** Serum antibodies recognizing YFV NS1 were  
451 detected by indirect ELISA, in essence, as previously described (72, 73). In brief, ELISA plates (Nunc  
452 MaxiSorp, ThermoFisher Scientific) were coated with 1 µg/ml recombinant YFV NS1 (Biorad, cat #  
453 PIP052A) in 50 mM carbonate buffer (pH; 9.6) overnight at 4°C. After three washes with PBS-T (PBS  
454 with 0,05% Tween 80), plates were blocked with 2% BSA in PBS-T for 1 h at 37°C, or alternatively  
455 overnight at 4°C. After three washes with PBS-T, wells were treated with serial dilutions of test sera (2-  
456 fold serial dilution in PBS-T) for 2 h at room temperature. Serial dilutions of the YFV NS1-specific mouse  
457 IgG2a monoclonal antibody (clone 1A5, kindly provided by J.J. Schlesinger) (27) starting at 10 µg/mL  
458 served as standard. After four washes with PBS, plates were incubated with horseradish peroxidase-  
459 labelled goat anti-mouse IgG antibody (Sigma-Aldrich, cat # AP124P, diluted 1:3000 in PBS-T) for 1 h.  
460 After another four washes with PBS, bound antibodies were detected via conversion of added TMB  
461 (SureBlue TMB Microwell Peroxidase; KPL). The reaction was stopped after 10 minutes by adding equal  
462 quantities of 1 M HCl solution, and absorbance was measured at 450 nm. After background subtraction,  
463 relative anti-YFV NS1 titers were determined by comparison to the standard curve generated for mAb  
464 1A5 included in each assay plate. To that end, the dilution at which each individual test serum yielded

465 an OD 450 of 1 was used to calculate an absolute anti-NS1 antibody concentration (equivalent  
466 concentration), assuming a similar binding to YFV-17D NS1 as by mAb 1A5. Only values that exceeded  
467 three times the background signal were considered positive.

468 **Antibody-dependent cell-mediated cytotoxicity (ADCC) bioassay.** To assess the possible role of  
469 non-neutralizing YFV antibody-mediated protection against YFV post JE-CVax vaccination, antibody-  
470 dependent cell-mediated cytotoxicity (ADCC) bioassays (29) were performed as prescribed by the  
471 manufacturer (ADCC reporter bioassay, complete kit, Promega, cat # G7010). In brief, target cells (T)  
472 were prepared by infecting HEK 293T cells with YFV-17D-mCherry in assay medium. Cells were  
473 incubated at 37°C post-infection and later upon onset of CPE harvested by trypsinization. Cells were  
474 again plated in white, flat-bottom 96-well assay plates (Viewplate-96, PerkinElmer cat # 6005181) at a  
475 density of 7500 and 25000 cells per well for 8 hrs at 37°C in assay medium. Later, in a separate 96 well  
476 plate, JE-CVax hyper-immune and non-immune heat inactivated mouse serum samples (starting dilution  
477 of 1/9) were serially diluted 3-folds in RPMI 1640 medium (Gibco, ThermoFisher Scientific)  
478 supplemented with 4% low IgG serum. ADCC bioassay effector cells (Jurkat V variant cells) were diluted  
479 to  $3 \times 10^6$  cells/ml in RPMI 1640 medium. The supernatant from the infected cell plate was replaced  
480 with fresh RPMI medium (25  $\mu$ l/well) and diluted serum samples (25  $\mu$ l/well) and E cells (25  $\mu$ l/well) were  
481 added to the infection plate. After incubation at 37°C for 24 h, Bio-Glo luciferase assay reagent  
482 (75  $\mu$ l/well) was added, and luminescence was measured using a Spark® Multimode Microplate Reader  
483 (Tecan). The average background plus three standard deviations was calculated and used as  
484 background.

485 **Intracellular staining of NS1 protein in HEK-293 cells.** HEK-293 cells transfected with pCMV-YFV-  
486 17D NS1-IRES-EGFP or infected with YFV-17D-mCherry were detached with trypsin-EDTA (0,05%),  
487 centrifuged (at 2500 rpm and 4°C for 5 minutes) and suspended in FACS-B (DPBS, no  $Ca^{2+}/Mg^{2+}$ , 2%  
488 FBS, 2 mM EDTA). Not more than  $5 \times 10^6$  cells per well were seeded into round-bottom 96-well plates  
489 (Costar, Corning Inc., Corning), spun down, and the supernatant was removed. Dead cells were stained  
490 *in vitro* with ZombieAqua (Biolegend, 1:500 diluted in DPBS) to exclude from further analysis. After  
491 washing and fixation with 2% paraformaldehyde (in FACS-B), cells were permeabilized by 0.1% saponin  
492 (in FACS-B with 1% normal mouse serum) with streptavidin added (Streptavidin/Biotin Blocking Kit,  
493 Vector Laboratories) to block endogenous biotin (permeabilizing and blocking solution). The cells were  
494 then stained with anti-NS1 primary antibody solution (clone 1A5, 5 $\mu$ g/ml), or JE-CVax-vaccinated mouse

495 serum (1:10) in permeabilizing and blocking solution. Anti-NS1 antibody binding was detected by a  
496 biotinylated goat anti-mouse IgG secondary antibody solution (ThermoFisher Scientific, cat # A16076;  
497 1:200 dilution). The biotinylated secondary antibody was stained subsequently with streptavidin-PE-Cy7  
498 (Biolegend, 1:200 dilution). After washing the cells, they were resuspended in FACS-B and filtered  
499 through 100  $\mu\text{m}$  nylon meshes (Sefar, ELKO Filtering, 03-100/44) prior to analysis on a flow cytometer  
500 (LSR Fortessa X-20, Becton Dickinson). The data were analysed using FlowJo 10 software (TreeStar).  
501 The gating strategy for the analysis is depicted in Fig. S10A.

502 **Processing of mouse spleens for the preparation of single cell suspensions.** Six-eight weeks old  
503 C57BL/6 or AG129 mice were vaccinated with  $10^4$  PFU JE-CVax and four/eighteen weeks later, the  
504 animals were euthanized for analysis. Spleens were harvested and processed for ELISpot and flow  
505 cytometric analysis. To generate single-cell suspensions, spleens were pushed through 70  $\mu\text{m}$  cell  
506 strainers (BD Biosciences) with syringe plungers, digested in 1.0 mg/ml type-1 collagenase and 10 U/ml  
507 DNase for 30 minutes, vigorously pipetted and filtered through 100  $\mu\text{m}$  nylon meshes. Spleen samples  
508 were then incubated with red blood cell lysis buffer (eBioscience) for 8 minutes at room temperature and  
509 washed twice with FACS-B.

510 **ELISpot.** Mouse TNF- $\alpha$  and IFN- $\gamma$  Enzyme-Linked ImmunoSpot (ELISpot) assays were performed with  
511 a mouse TNF- $\alpha$  ELISpot kit (ImmunoSpot MTNFA-1M/5, CTL Europe GmbH) or a mouse IFN- $\gamma$  ELISpot  
512 kit (ImmunoSpot MIFNG-1M/5, CTL Europe GmbH) according to the manufacturer's instructions. Assay  
513 plates (96-well PVDF membrane), antibodies, enzymes, substrate and diluent were included in the kits.  
514 Briefly,  $4 \times 10^5$  mouse splenocytes/well were plated with either with 5  $\mu\text{g}/\text{ml}$  YFV-17D NS3 ATLTYRML  
515 peptide antigen (57) or with 50  $\mu\text{g}/\text{ml}$  of total Vero E6 cellular antigen in RPMI 1640 medium (Gibco,  
516 Belgium) supplemented with 10% fetal bovine serum, 2mM L-glutamine and 0.75% sodium bicarbonate.  
517 After 24 hours of incubation at 37°C, spots of mouse TNF- $\alpha$  or IFN- $\gamma$  were visualized by subsequent  
518 addition of detection antibody, enzyme and substrate. All plates were scanned using an ImmunoSpot  
519 S6 Universal Reader (CTL Europe GmbH). Spot counts were normalized by subtracting the number of  
520 spots from corresponding samples stimulated with non-infected Vero E6.

521 **Intracellular cytokine staining for memory T cells and flow cytometry.** To restimulate memory T  
522 cells, freshly isolated single cell suspensions of splenocytes were seeded at  $3 \times 10^6$  cells density per  
523 well in a round-bottom 96-well plate, and incubated with either 5  $\mu\text{g}/\text{ml}$  of the MHC I class restricted

524 peptide from YFV-17D NS3 (ATLTYRML) (57) or 50 µg/ml of total cellular antigen (infected or non-  
525 infected VeroE6 lysate). Following over-night incubation, the splenocytes were incubated for 2 h with 5  
526 µg/ml brefeldin A (Biolegend) for intracellular trapping of cytokines and then stained with Zombie Aqua  
527 (1:200) in PBS for 15 min. Splenocytes were then stained for CD3 (4 µg/ml eFluor 450 α-mouse CD3  
528 antibody; ThermoFisher Scientific) and CD8 (2 µg/ml APC/Cy7 α-mouse CD8a antibody; Biolegend) in  
529 PBS for 20 min before fixation in 2% paraformaldehyde (Sigma-Aldrich), and permeabilization and  
530 blocking in a mixture of 0.1% saponin and 1% normal mouse serum. Finally, splenocytes were stained  
531 intracellularly for TNFα (6.5 µg/ml PE anti-mouse TNFα, Biolegend) and IFN-γ (2 µg/ml APC α-mouse  
532 IFN-γ, Biolegend) prior to analysis on a flow cytometer (LSR Fortessa X-20, Becton Dickinson). Gating  
533 FSC-A/SSC-A excluded debris, SSC-H/SSC-W and FSC-H/FSC-W excluded doublet cells. The data  
534 were analysed using FlowJo 10 software (TreeStar). To determine the percentage of responding CD4+  
535 or CD8+ T lymphocytes, the percentage of responders from samples stimulated with non-infected Vero  
536 E6 lysates were subtracted from the corresponding responses. The gating strategy for the analysis is  
537 depicted in Fig. S10B.

538 **Statistical analysis.** Graph Pad Prism 7 (GraphPad Software, Inc.) was used for all statistical  
539 evaluations. Quantitative data were represented as mean ± standard deviation (SD) and obtained from  
540 at least three independent experiments. For ADCC assays, flow cytometry analysis and ELISpot assays  
541 data were represented as mean ± standard error of mean (SEM). Statistical significance was determined  
542 using survival analysis with log-rank (Mantel-Cox) test, one-way ANOVA analysis (neutralization titers  
543 and ELISA), two-way ANOVA analysis (ADCC), paired t-test (flow cytometry) and Wilcoxon matched  
544 pairs signed rank test (comparison of paired post-vaccinated and post-challenge samples). Correlation  
545 studies were performed using linear regression analysis with Pearson's correlation coefficient. Values  
546 were considered statistically significantly different at  $p$ -values  $\leq 0.05$ .

547

## 548 **SUPPLEMENTAL MATERIAL**

549 Supplemental material for the article is added as Fig. S1-S10.

550

## 551 **ACKNOWLEDGEMENT**

552 The authors thank Katrien Geerts and Sarah Debaveye for their excellent technical assistance, Jef  
553 Ceulemans and Jonas Piot for their contribution to assay development, and Robert Vrancken and Joeri  
554 Auwerx for assisting in the generation of recombinant JEV SA14-14-2.

555

## 556 **FUNDING INFORMATION**

557 The project received funding from the European Union's Horizon 2020 research and innovation  
558 programme under RABYD-VAX grant agreement No 733176. This work was further supported by KU  
559 Leuven IOF Hefboom (IOF HB/13/010) and KU Leuven C3 (C32/16/039) grants. REM was granted a  
560 fellowship by the CNPq/FWO (No 52/2012). MAS was granted a Senior Postdoctoral Fellowship by the  
561 KU Leuven Rega Foundation.



## 562 REFERENCES

- 563 1. Ishikawa T, Yamanaka A, Konishi E. 2014. A review of successful flavivirus vaccines and the problems with those flaviviruses  
564 for which vaccines are not yet available. *Vaccine* 32:1326-37.
- 565 2. Petersen LR, Jamieson DJ, Powers AM, Honein MA. 2016. Zika Virus. *N Engl J Med* 374:1552-63.
- 566 3. Wilder-Smith A, Monath TP. 2017. Responding to the threat of urban yellow fever outbreaks. *Lancet Infect Dis* 17:248-250.
- 567 4. Simon-Loriere E, Faye O, Prot M, Casademont I, Fall G, Fernandez-Garcia MD, Diagne MM, Kipela JM, Fall IS, Holmes  
568 EC, Sakuntabhai A, Sall AA. 2017. Autochthonous Japanese Encephalitis with Yellow Fever Coinfection in Africa. *N Engl J*  
569 *Med* 376:1483-1485.
- 570 5. Who. 2015. Vaccines and vaccination against yellow fever: WHO Position Paper, June 2013--recommendations. *Vaccine*  
571 33:76-7.
- 572 6. Barrett AD. 2016. Yellow Fever in Angola and Beyond--The Problem of Vaccine Supply and Demand. *N Engl J Med* 375:301-  
573 3.
- 574 7. Gershman MD, Angelo KM, Ritchey J, Greenberg DP, Muhammad RD, Brunette G, Cetron MS, Sotir MJ. 2017. Addressing  
575 a Yellow Fever Vaccine Shortage - United States, 2016-2017. *MMWR Morb Mortal Wkly Rep* 66:457-459.
- 576 8. Wasserman S, Tambyah PA, Lim PL. 2016. Yellow fever cases in Asia: primed for an epidemic. *Int J Infect Dis* 48:98-103.
- 577 9. Chen Z, Liu L, Lv Y, Zhang W, Li J, Zhang Y, Di T, Zhang S, Liu J, Qu J, Hua W, Li C, Wang P, Zhang Q, Xu Y, Jiang R,  
578 Wang Q, Chen L, Wang S, Pang X, Liang M, Ma X, Li X, Zhang F, Li D. 2016. A fatal yellow fever virus infection in China:  
579 description and lessons. *Emerg Microbes Infect* 5:e69.
- 580 10. Li X, Ma SJ, Liu X, Jiang LN, Zhou JH, Xiong YQ, Ding H, Chen Q. 2014. Immunogenicity and safety of currently available  
581 Japanese encephalitis vaccines: a systematic review. *Hum Vaccin Immunother* 10:3579-93.
- 582 11. Monath TP, Seligman SJ, Robertson JS, Guy B, Hayes EB, Condit RC, Excler JL, Mac LM, Carbery B, Chen RT,  
583 BCVVSWG. 2015. Live virus vaccines based on a yellow fever vaccine backbone: standardized template with key  
584 considerations for a risk/benefit assessment. *Vaccine* 33:62-72.
- 585 12. Dans AL, Dans LF, Lansang MAD, Silvestre MAA, Guyatt GH. 2018. Controversy and debate on dengue vaccine series-  
586 paper 1: review of a licensed dengue vaccine: inappropriate subgroup analyses and selective reporting may cause harm in  
587 mass vaccination programs. *J Clin Epidemiol* 95:137-139.
- 588 13. Aguiar M, Stollenwerk N. 2018. Dengvaxia Efficacy Dependency on Serostatus: A Closer Look at More Recent Data. *Clin*  
589 *Infect Dis* 66:641-642.
- 590 14. Wilder-Smith A. 2018. Four-year safety follow-up of the tetravalent dengue vaccine CYD-TDV. *Clin Microbiol Infect* 24:680-  
591 681.
- 592 15. Pierson TC, Fremont DH, Kuhn RJ, Diamond MS. 2008. Structural insights into the mechanisms of antibody-mediated  
593 neutralization of flavivirus infection: implications for vaccine development. *Cell Host Microbe* 4:229-38.
- 594 16. Watson AM, Lam LK, Klimstra WB, Ryman KD. 2016. The 17D-204 Vaccine Strain-Induced Protection against Virulent  
595 Yellow Fever Virus Is Mediated by Humoral Immunity and CD4+ but not CD8+ T Cells. *PLoS Pathog* 12:e1005786.
- 596 17. Putnak JR, Schlesinger JJ. 1990. Protection of mice against yellow fever virus encephalitis by immunization with a vaccinia  
597 virus recombinant encoding the yellow fever virus non-structural proteins, NS1, NS2a and NS2b. *J Gen Virol* 71 ( Pt 8):1697-  
598 702.
- 599 18. Schlesinger JJ, Foltzer M, Chapman S. 1993. The Fc portion of antibody to yellow fever virus NS1 is a determinant of  
600 protection against YF encephalitis in mice. *Virology* 192:132-41.
- 601 19. Schlesinger JJ, Brandriss MW, Cropp CB, Monath TP. 1986. Protection against yellow fever in monkeys by immunization  
602 with yellow fever virus nonstructural protein NS1. *J Virol* 60:1153-5.
- 603 20. Rastogi M, Sharma N, Singh SK. 2016. Flavivirus NS1: a multifaceted enigmatic viral protein. *Viol J* 13:131.
- 604 21. Chung KM, Thompson BS, Fremont DH, Diamond MS. 2007. Antibody recognition of cell surface-associated NS1 triggers  
605 Fc-gamma receptor-mediated phagocytosis and clearance of West Nile Virus-infected cells. *J Virol* 81:9551-5.
- 606 22. Bailey MJ, Broecker F, Duehr J, Arumemi F, Krammer F, Palese P, Tan GS. 2019. Antibodies Elicited by an NS1-Based  
607 Vaccine Protect Mice against Zika Virus. *MBio* 10.
- 608 23. Bassi MR, Larsen MA, Kongsgaard M, Rasmussen M, Buus S, Stryhn A, Thomsen AR, Christensen JP. 2016. Vaccination  
609 with Replication Deficient Adenovectors Encoding YF-17D Antigens Induces Long-Lasting Protection from Severe Yellow  
610 Fever Virus Infection in Mice. *PLoS Negl Trop Dis* 10:e0004464.
- 611 24. Desprès P, Dietrich J, Girard M, Bouloy M. 1991. Recombinant baculoviruses expressing yellow fever virus E and NS1  
612 proteins elicit protective immunity in mice. *J Gen Virol* 72 ( Pt 11):2811-6.
- 613 25. Chan KR, Wang X, Saron WAA, Gan ES, Tan HC, Mok DZL, Zhang SL, Lee YH, Liang C, Wijaya L, Ghosh S, Cheung YB,  
614 Tannenbaum SR, Abraham SN, St John AL, Low JGH, Ooi EE. 2016. Cross-reactive antibodies enhance live attenuated  
615 virus infection for increased immunogenicity. *Nat Microbiol* 1:16164.
- 616 26. Li J, Gao N, Fan D, Chen H, Sheng Z, Fu S, Liang G, An J. 2016. Cross-protection induced by Japanese encephalitis  
617 vaccines against different genotypes of Dengue viruses in mice. *Sci Rep* 6:19953.
- 618 27. Schlesinger JJ, Brandriss MW, Monath TP. 1983. Monoclonal antibodies distinguish between wild and vaccine strains of  
619 yellow fever virus by neutralization, hemagglutination inhibition, and immune precipitation of the virus envelope protein.  
620 *Virology* 125:8-17.



- 621 28. Kum DB, Mishra N, Boudewijns R, Gladwyn-Ng I, Alfano C, Ma J, Schmid MA, Marques RE, Schols D, Kaptein S, Nguyen  
622 L, Neyts J, Dallmeier K. 2018. A yellow fever-Zika chimeric virus vaccine candidate protects against Zika infection and  
623 congenital malformations in mice. *NPJ Vaccines* 3:56.
- 624 29. Cheng ZJ, Garvin D, Paguio A, Moravec R, Engel L, Fan F, Surowy T. 2014. Development of a robust reporter-based ADCC  
625 assay with frozen, thaw-and-use cells to measure Fc effector function of therapeutic antibodies. *J Immunol Methods* 414:69-  
626 81.
- 627 30. Akondy RS, Monson ND, Miller JD, Edupuganti S, Teuwen D, Wu H, Quyyumi F, Garg S, Altman JD, Del Rio C, Keyserling  
628 HL, Ploss A, Rice CM, Orenstein WA, Mulligan MJ, Ahmed R. 2009. The yellow fever virus vaccine induces a broad and  
629 polyfunctional human memory CD8+ T cell response. *J Immunol* 183:7919-30.
- 630 31. Li XF, Deng YQ, Yang HQ, Zhao H, Jiang T, Yu XD, Li SH, Ye Q, Zhu SY, Wang HJ, Zhang Y, Ma J, Yu YX, Liu ZY, Li YH,  
631 Qin ED, Shi PY, Qin CF. 2013. A chimeric dengue virus vaccine using Japanese encephalitis virus vaccine strain SA14-14-  
632 2 as backbone is immunogenic and protective against either parental virus in mice and nonhuman primates. *J Virol*  
633 87:13694-705.
- 634 32. Bassi MR, Kongsgaard M, Steffensen MA, Fenger C, Rasmussen M, Skjødt K, Finsen B, Stryhn A, Buus S, Christensen JP,  
635 Thomsen AR. 2015. CD8+ T cells complement antibodies in protecting against yellow fever virus. *J Immunol* 194:1141-53.
- 636 33. Calvert AE, Dixon KL, Delorey MJ, Blair CD, Roehrig JT. 2014. Development of a small animal peripheral challenge model  
637 of Japanese encephalitis virus using interferon deficient AG129 mice and the SA14-14-2 vaccine virus strain. *Vaccine*  
638 32:258-64.
- 639 34. Thibodeaux BA, Garbino NC, Liss NM, Piper J, Blair CD, Roehrig JT. 2012. A small animal peripheral challenge model of  
640 yellow fever using interferon-receptor deficient mice and the 17D-204 vaccine strain. *Vaccine* 30:3180-7.
- 641 35. Meier KC, Gardner CL, Khoretchenko MV, Klimstra WB, Ryman KD. 2009. A mouse model for studying viscerotropic disease  
642 caused by yellow fever virus infection. *PLoS Pathog* 5:e1000614.
- 643 36. Yang J, Yang H, Li Z, Lin H, Zhao Y, Wang W, Tan S, Zeng X, Li Y. 2017. The chimeric Japanese encephalitis/Dengue 2  
644 virus protects mice from challenge by both dengue virus and JEV virulent virus. *Protein Cell* 8:225-229.
- 645 37. Zellweger RM, Tang WW, Eddy WE, King K, Sanchez MC, Shresta S. 2015. CD8+ T Cells Can Mediate Short-Term  
646 Protection against Heterotypic Dengue Virus Reinfection in Mice. *J Virol* 89:6494-505.
- 647 38. Xu X, Vaughan K, Weiskopf D, Grifoni A, Diamond MS, Sette A, Peters B. 2016. Identifying Candidate Targets of Immune  
648 Responses in Zika Virus Based on Homology to Epitopes in Other Flavivirus Species. *PLoS Curr* 8.
- 649 39. Nasveld PE, Marjason J, Bennett S, Aaskov J, Elliott S, McCarthy K, Kanesa-Thasan N, Feroldi E, Reid M. 2010.  
650 Concomitant or sequential administration of live attenuated Japanese encephalitis chimeric virus vaccine and yellow fever  
651 17D vaccine: randomized double-blind phase II evaluation of safety and immunogenicity. *Hum Vaccin* 6:906-14.
- 652 40. Chambers TJ, Nestorowicz A, Mason PW, Rice CM. 1999. Yellow fever/Japanese encephalitis chimeric viruses: construction  
653 and biological properties. *J Virol* 73:3095-101.
- 654 41. Monath TP, Soike K, Levenbook I, Zhang ZX, Arroyo J, Delagrave S, Myers G, Barrett AD, Shope RE, Ratterree M,  
655 Chambers TJ, Guirakhoo F. 1999. Recombinant, chimaeric live, attenuated vaccine (ChimeriVax) incorporating the envelope  
656 genes of Japanese encephalitis (SA14-14-2) virus and the capsid and nonstructural genes of yellow fever (17D) virus is  
657 safe, immunogenic and protective in non-human primates. *Vaccine* 17:1869-82.
- 658 42. Stiasny K, Kiermayr S, Holzmann H, Heinz FX. 2006. Cryptic properties of a cluster of dominant flavivirus cross-reactive  
659 antigenic sites. *J Virol* 80:9557-68.
- 660 43. Schlesinger JJ, Brandriss MW, Putnak JR, Walsh EE. 1990. Cell surface expression of yellow fever virus non-structural  
661 glycoprotein NS1: consequences of interaction with antibody. *J Gen Virol* 71 ( Pt 3):593-9.
- 662 44. Gould EA, Buckley A, Barrett AD, Cammack N. 1986. Neutralizing (54K) and non-neutralizing (54K and 48K) monoclonal  
663 antibodies against structural and non-structural yellow fever virus proteins confer immunity in mice. *J Gen Virol* 67 ( Pt  
664 3):591-5.
- 665 45. James EA, LaFond RE, Gates TJ, Mai DT, Malhotra U, Kwok WW. 2013. Yellow fever vaccination elicits broad functional  
666 CD4+ T cell responses that recognize structural and nonstructural proteins. *J Virol* 87:12794-804.
- 667 46. Barrett AD, Gould EA. 1986. Comparison of neurovirulence of different strains of yellow fever virus in mice. *J Gen Virol* 67 ( Pt  
668 4):631-7.
- 669 47. Perelygin AA, Scherbik SV, Zhulin IB, Stockman BM, Li Y, Brinton MA. 2002. Positional cloning of the murine flavivirus  
670 resistance gene. *Proc Natl Acad Sci U S A* 99:9322-7.
- 671 48. Theiler M, Smith HH. 1937. THE USE OF YELLOW FEVER VIRUS MODIFIED BY IN VITRO CULTIVATION FOR HUMAN  
672 IMMUNIZATION. *J Exp Med* 65:787-800.
- 673 49. Monath TP, Guirakhoo F, Nichols R, Yoksan S, Schrader R, Murphy C, Blum P, Woodward S, McCarthy K, Mathis D,  
674 Johnson C, Bedford P. 2003. Chimeric live, attenuated vaccine against Japanese encephalitis (ChimeriVax-JE): phase 2  
675 clinical trials for safety and immunogenicity, effect of vaccine dose and schedule, and memory response to challenge with  
676 inactivated Japanese encephalitis antigen. *J Infect Dis* 188:1213-30.
- 677 50. Guirakhoo F, Kitchener S, Morrison D, Forrat R, McCarthy K, Nichols R, Yoksan S, Duan X, Ermak TH, Kanesa-Thasan N,  
678 Bedford P, Lang J, Quentin-Millet MJ, Monath TP. 2006. Live attenuated chimeric yellow fever dengue type 2 (ChimeriVax-  
679 DEN2) vaccine: Phase I clinical trial for safety and immunogenicity: effect of yellow fever pre-immunity in induction of cross  
680 neutralizing antibody responses to all 4 dengue serotypes. *Hum Vaccin* 2:60-7.

- 681 51. Xie X, Yang Y, Muruato AE, Zou J, Shan C, Nunes BT, Medeiros DB, Vasconcelos PF, Weaver SC, Rossi SL, Shi PY. 2017.  
682 Understanding Zika Virus Stability and Developing a Chimeric Vaccine through Functional Analysis. *MBio* 8.
- 683 52. Arroyo J, Guirakhoo F, Fenner S, Zhang ZX, Monath TP, Chambers TJ. 2001. Molecular basis for attenuation of  
684 neurovirulence of a yellow fever Virus/Japanese encephalitis virus chimera vaccine (ChimeriVax-JE). *J Virol* 75:934-42.
- 685 53. Zmurko J, Marques RE, Schols D, Verbeken E, Kaptein SJ, Neyts J. 2016. The Viral Polymerase Inhibitor 7-Deaza-2'-C-  
686 Methyladenosine Is a Potent Inhibitor of In Vitro Zika Virus Replication and Delays Disease Progression in a Robust Mouse  
687 Infection Model. *PLoS Negl Trop Dis* 10:e0004695.
- 688 54. Bredenbeek PJ, Kooi EA, Lindenbach B, Huijckman N, Rice CM, Spaan WJ. 2003. A stable full-length yellow fever virus  
689 cDNA clone and the role of conserved RNA elements in flavivirus replication. *J Gen Virol* 84:1261-8.
- 690 55. Demidenko AA, Blattman JN, Blattman NN, Greenberg PD, Nibert ML. 2013. Engineering recombinant reoviruses with  
691 tandem repeats and a tetravirus 2A-like element for exogenous polypeptide expression. *Proc Natl Acad Sci U S A*  
692 110:E1867-76.
- 693 56. Avirutnan P, Fuchs A, Hauhart RE, Somnuk P, Youn S, Diamond MS, Atkinson JP. 2010. Antagonism of the complement  
694 component C4 by flavivirus nonstructural protein NS1. *J Exp Med* 207:793-806.
- 695 57. Barba-Spaeth G, Longman RS, Albert ML, Rice CM. 2005. Live attenuated yellow fever 17D infects human DCs and allows  
696 for presentation of endogenous and recombinant T cell epitopes. *J Exp Med* 202:1179-84.
- 697 58. Li XF, Li XD, Deng CL, Dong HL, Zhang QY, Ye Q, Ye HQ, Huang XY, Deng YQ, Zhang B, Qin CF. 2017. Visualization of  
698 a neurotropic flavivirus infection in mouse reveals unique viscerotropism controlled by host type I interferon signaling.  
699 *Theranostics* 7:912-925.
- 700 59. Aguirre S, Maestre AM, Pagni S, Patel JR, Savage T, Gutman D, Maringer K, Bernal-Rubio D, Shabman RS, Simon V,  
701 Rodriguez-Madoz JR, Mulder LC, Barber GN, Fernandez-Sesma A. 2012. DENV inhibits type I IFN production in infected  
702 cells by cleaving human STING. *PLoS Pathog* 8:e1002934.
- 703 60. Ashour J, Morrison J, Laurent-Rolle M, Belicha-Villanueva A, Plumlee CR, Bernal-Rubio D, Williams KL, Harris E,  
704 Fernandez-Sesma A, Schindler C, Garcia-Sastre A. 2010. Mouse STAT2 restricts early dengue virus replication. *Cell Host*  
705 *Microbe* 8:410-21.
- 706 61. Grant A, Ponia SS, Tripathi S, Balasubramaniam V, Miorin L, Sourisseau M, Schwarz MC, Sanchez-Seco MP, Evans MJ,  
707 Best SM, Garcia-Sastre A. 2016. Zika Virus Targets Human STAT2 to Inhibit Type I Interferon Signaling. *Cell Host Microbe*  
708 19:882-90.
- 709 62. Erickson AK, Pfeiffer JK. 2015. Spectrum of disease outcomes in mice infected with YFV-17D. *J Gen Virol* 96:1328-39.
- 710 63. Laurent-Rolle M, Boer EF, Lubick KJ, Wolfenbarger JB, Carmody AB, Rockx B, Liu W, Ashour J, Shupert WL, Holbrook MR,  
711 Barrett AD, Mason PW, Bloom ME, Garcia-Sastre A, Khromykh AA, Best SM. 2010. The NS5 protein of the virulent West  
712 Nile virus NY99 strain is a potent antagonist of type I interferon-mediated JAK-STAT signaling. *J Virol* 84:3503-15.
- 713 64. Muñoz-Jordán JL, Laurent-Rolle M, Ashour J, Martínez-Sobrido L, Ashok M, Lipkin WI, Garcia-Sastre A. 2005. Inhibition of  
714 alpha/beta interferon signaling by the NS4B protein of flaviviruses. *J Virol* 79:8004-13.
- 715 65. Julander JG. 2016. Animal models of yellow fever and their application in clinical research. *Curr Opin Virol* 18:64-9.
- 716 66. Lam LKM, Watson AM, Ryman KD, Klimstra WB. 2018. Gamma-interferon exerts a critical early restriction on replication  
717 and dissemination of yellow fever virus vaccine strain 17D-204. *NPJ Vaccines* 3:5.
- 718 67. Huang S, Hendriks W, Althage A, Hemmi S, Bluethmann H, Kamijo R, Vilcek J, Zinkernagel RM, Aguet M. 1993. Immune  
719 response in mice that lack the interferon-gamma receptor. *Science* 259:1742-5.
- 720 68. Kruisbeek AM. 2001. In vivo depletion of CD4- and CD8-specific T cells. *Curr Protoc Immunol* Chapter 4:Unit 4.1.
- 721 69. Johnson BW, Kosoy O, Hunsperger E, Beltran M, Delorey M, Guirakhoo F, Monath T. 2009. Evaluation of chimeric Japanese  
722 encephalitis and dengue viruses for use in diagnostic plaque reduction neutralization tests. *Clin Vaccine Immunol* 16:1052-  
723 9.
- 724 70. Reed LJ, Muench H. 1938. A SIMPLE METHOD OF ESTIMATING FIFTY PER CENT ENDPOINTS<sup>12</sup>. *American Journal of*  
725 *Epidemiology* 27:493-497.
- 726 71. Jochmans D, Leyssen P, Neyts J. 2012. A novel method for high-throughput screening to quantify antiviral activity against  
727 viruses that induce limited CPE. *J Virol Methods* 183:176-9.
- 728 72. Chao DY, Galula JU, Shen WF, Davis BS, Chang GJ. 2015. Nonstructural protein 1-specific immunoglobulin M and G  
729 antibody capture enzyme-linked immunosorbent assays in diagnosis of flaviviral infections in humans. *J Clin Microbiol*  
730 53:557-66.
- 731 73. Falgout B, Bray M, Schlesinger JJ, Lai CJ. 1990. Immunization of mice with recombinant vaccinia virus expressing authentic  
732 dengue virus nonstructural protein NS1 protects against lethal dengue virus encephalitis. *J Virol* 64:4356-63.

733 **LEGENDS TO THE FIGURES**

734

735 **FIG 1** *In vivo* evaluation of JE-CVax-mediated dual protection against lethal JEV SA14-14-2 and YFV-  
736 17D challenge. **(A-D)** AG129 and C57BL/6 mice were first vaccinated via the i.p. route with either  $10^4$   
737 PFU of JE-CVax (blue), 1/6th of a human dose of Ixiaro® (green), or assay medium as negative control  
738 (red). Animals vaccinated with Ixiaro® were boosted with another 1/6th of a human dose of Ixiaro® 14  
739 dpv. In order to facilitate vaccine virus replication (28), wild-type C57BL/6 mice receiving JE-CVax  
740 vaccination were treated with MAR1-5A3 antibody. AG129 mice were i.p. challenged with either  $10^3$  of  
741 PFU JEV SA14-14-2 at 28 dpv **(A)**, or with  $10^3$  PFU of YFV-17D at **(B)** 28 dpv, or **(C)** at 0, 4, 7, 14, 21  
742 and 28 dpv. C57BL/6 mice were i.c. challenged with  $10^4$  PFU of YFV-17D at 28 dpv **(D)**. Animals were  
743 observed for five weeks after challenge and were euthanized when humane endpoints were reached.  
744 The data **(A-C)** shown represent cumulative results of at least two independent experiments. Log-rank  
745 (Mantel-Cox) survival analysis test was performed for statistical significance. \*\* p-value  $\leq 0.01$  and \*\*\*\*  
746 p-value  $\leq 0.001$  compared to the non-vaccinated group.

747

748 **FIG 2** Serological analysis of serum of JE-CVax-vaccinated and YFV-17D- or ZIKV-MR766-challenged  
749 animals. **(A)** Detection of nAbs against JEV and YFV. CPE neutralization tests (CPENT) for JE-CVax  
750 (●) and YFV-17D (■) were performed on sera d0 prior to vaccination (pre-immune, red), d28 after  
751 vaccination (blue) and after challenge (study endpoint, orange) for samples of JE-CVax-vaccinated  
752 AG129 mice, of JE-CVax-vaccinated mice after subsequent YFV-17D-challenge (n = 34), of mice  
753 hyperimmunized with JE-CVax (n = 13, first bleed two weeks post last booster immunization, blue) and  
754 of mice vaccinated with Ixiaro® (green). Limit of detection (LOD) for virus neutralization was  $\log_{10}20$   
755 (1.3). Data presented as  $\log_{10}\text{CPENT}_{50}$  (mean  $\pm$  SD). The data presented are from  $n \geq 3$  independent  
756 experiments. Statistical significance was determined using one-way ANOVA analysis. \*\*\*\*p-value  $\leq$   
757 0.0001 to mean  $\log_{10}\text{CPENT}_{50}$  titers against JEV or YFV compared to mean  $\log_{10}\text{CPENT}_{50}$  titers pre JE-  
758 CVax vaccination and pre YFV-17D-challenge, respectively. **(B)** Quantitation of anti-YFV NS1 binding  
759 antibodies by direct ELISA. Serum from naïve, non-vaccinated mice (red) or mice that had been  
760 vaccinated with either  $10^{3-5}$  PFU JE-CVax (blue), or that had been infected with  $10^4$  PFU YFV-17D  
761 (orange) or with  $10^5$  PFU ZIKV-MR766 (pink) were collected either 28 days post immunization or when

762 euthanized at the humane endpoint ( $n \geq 5$ ). The data shown are means of two independent analyses.  
763 Statistical significance was determined using one-way ANOVA analysis. \*\* p-value  $\leq 0.01$  compared to  
764 YFV-17D. **(C)** Binding of serum antibodies to NS1 expressing cells. HEK-293 cells were transfected with  
765 a plasmid expressing YFV-17D NS1 as a transcriptional fusion to GFP (top), or infected with the YFV-  
766 17D-mCherry reporter virus (bottom). Either 48 h after transfection or 72 h after infection, cells were  
767 stained with the anti-YFV NS1-specific mAb 1A5 (mAb, left), with serum from mice that were vaccinated  
768 with JE-CVax (center), or with serum from naïve, non-vaccinated mice (right). Graph showing flow  
769 cytometric analysis of GFP or mCherry fluorescence and visualization of anti-YFV NS1 antibody binding  
770 using a PE-Cy7 conjugated goat anti-mouse IgG secondary antibody. The fraction of NS1 positive cells  
771 (GFP or mCherry) stained by mAb 1A5 or serum of JE-CVax-immunized mice ( $\alpha$ -mouse IgG) is given  
772 in percentage in the upper right quadrant. Data from one representative experiment out of four  
773 independent experiments.

774

775 **FIG 3** Role of antibody-dependent cell-mediated cytotoxicity (ADCC) conferred by JE-CVax  
776 hyperimmune serum in the protection against YFV. **(A, B)** JE-CVax hyperimmune serum (blue bars)  
777 was tested for its ability to mediate ADCC activity compared to serum of non-vaccinated mice (normal  
778 serum, red bars) at 3:1 **(A)** and 10:1 **(B)** effector (E) : target (T) cell ratios. Experiments were conducted  
779 twice, each in triplicate, and data presented as mean  $\pm$  SEM as fold changes compared to control (CC)  
780 [i.e. mean reporter signal plus three standard deviations from E:T in the absence of hyperimmune  
781 serum]. Values from non-infected target cells incubated with E in the presence of either hyperimmune  
782 serum or normal serum at highest antibody concentrations (dilution 1:9) are indicated as Control-9.  
783 Statistical significance was determined using two-way ANOVA analysis. \*, \*\*\*\* p-value  $\leq 0.05$  and  $\leq$   
784 0.0001 compared to normal serum.

785

786 **FIG 4** Detection of protective T cell responses directed against YFV. Detection of YFV-specific T cells.  
787 **(A-C)** ELISpot data showing TNF- $\alpha$  **(A)** IFN- $\gamma$  **(B, C)** and production by splenocytes of AG129 mice **(A,**  
788 **B)** or C57BL/6 **(C)** at 18- and 4-weeks, respectively, post-vaccination with  $10^4$  PFU of JE-CVax, following  
789 16 h *ex vivo* re-stimulation with either an MHC class I restricted peptide derived from YFV-17D NS3 (32)  
790 or the lysate of YFV-17D- or JEV SA14-14-2-infected Vero E6 cells. Stimulation using lysate of non-

791 infected Vero E6 cells served as negative control. Spot counts for TNF- $\alpha$  **(A)** IFN- $\gamma$  **(B, C)** or producing  
792 cells from **(A, B)** AG129 mice (n = 5) or **(c)** C57BL/6 mice (n = 10) animals, respectively. The data shown  
793 are derived from two independent experiments. Spot counts were normalized by subtraction of the  
794 number of spots in corresponding wells stimulated with uninfected Vero E6 cell lysate). **(D)** Cytokine  
795 expression profile of YFV-specific T cells. IFN- $\gamma$  and TNF- $\alpha$  production profile of YFV-specific CD4<sup>+</sup> or  
796 CD8<sup>+</sup> T cells from JE-CVax-vaccinated AG129 or C57BL/6, 18- and 4-weeks, respectively, post-  
797 vaccination, as determined by intracellular cytokine staining. Mouse splenocytes were stimulated 16h  
798 *ex vivo* with either an MHC I restricted NS3 peptide, cell lysate of YFV-17D-infected Vero E6 cells or  
799 uninfected Vero E6 cells. The data shown are derived from two independent experiments and  
800 normalized by subtraction of number of cytokine-secreting T cells in corresponding samples in which  
801 uninfected Vero E6 cell lysate was used as recall antigen. **(E)** T cell-mediated *in vivo* protection against  
802 YFV. Loss of protection resulting from antibody-mediated T cell depletion (30, 52) suggests a direct  
803 functional involvement of CD4<sup>+</sup> and CD8<sup>+</sup> T cells in JE-CVax-mediated immunity against YFV in  
804 C57BL/6 mice (n $\geq$ 7) that had been vaccinated with 10<sup>4</sup> PFU of JE-CVax and subsequently challenged  
805 intracranially with 10<sup>4</sup> PFU of YFV-17D. Depletions were performed by administration of 0.5 mg of  $\alpha$ -  
806 mouse CD4 and/or  $\alpha$ -mouse CD8a antibodies i.p. on day (-2) and day 0 each prior to YFV challenge.  
807 Log-rank (Mantel-Cox) survival analysis test was performed for statistical significance. \*, \*\* p-value  $\leq$   
808 0.05 and  $\leq$  0.01 compared to vaccinated group (n=5) and + p-value  $\leq$  0.05 compared to CD4<sup>+</sup> depleted  
809 group (n=8).

810 **FIGURES**

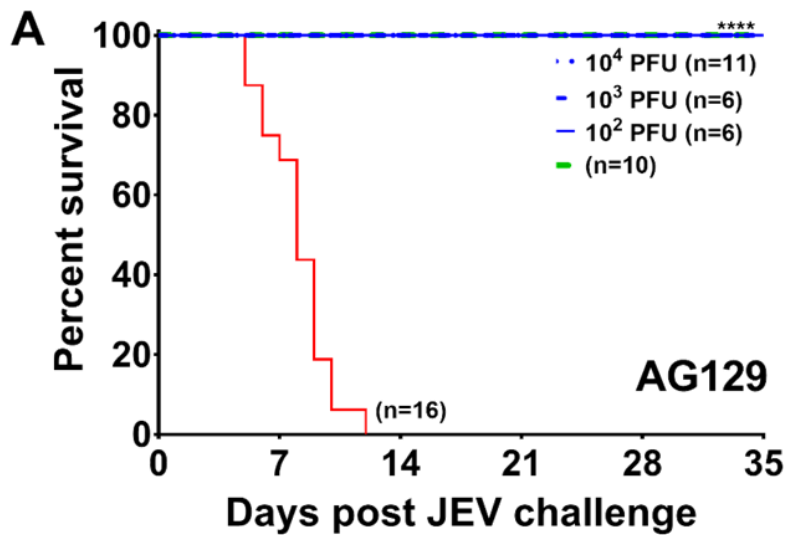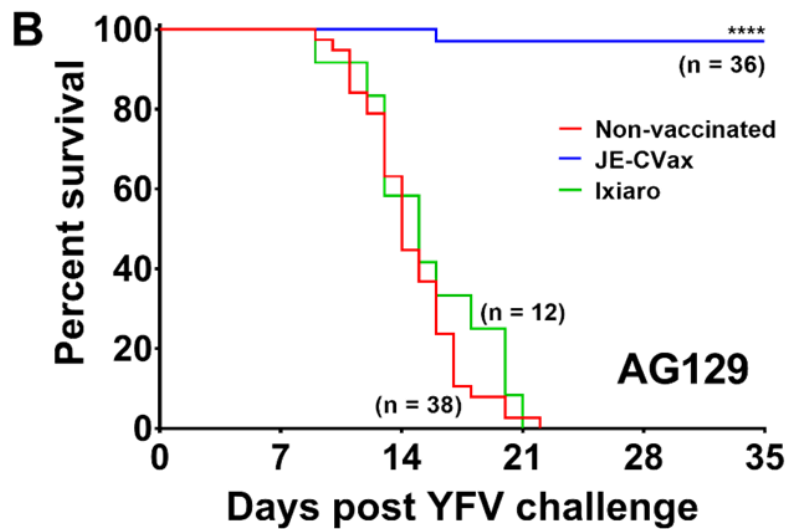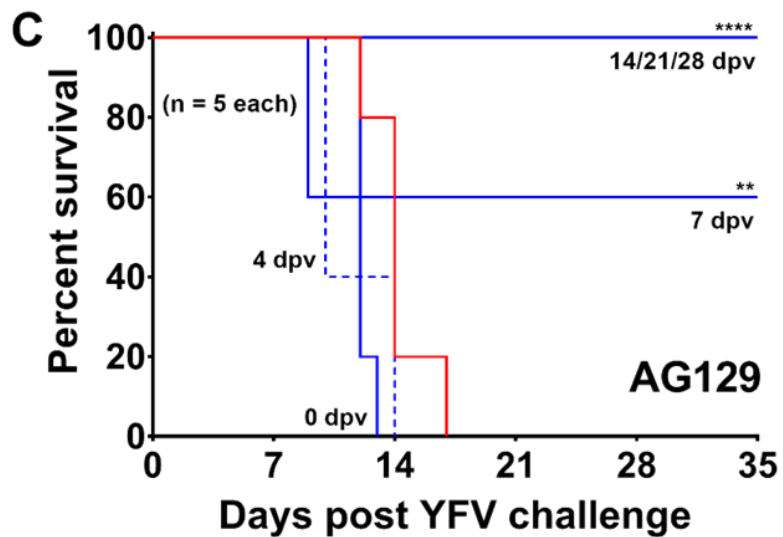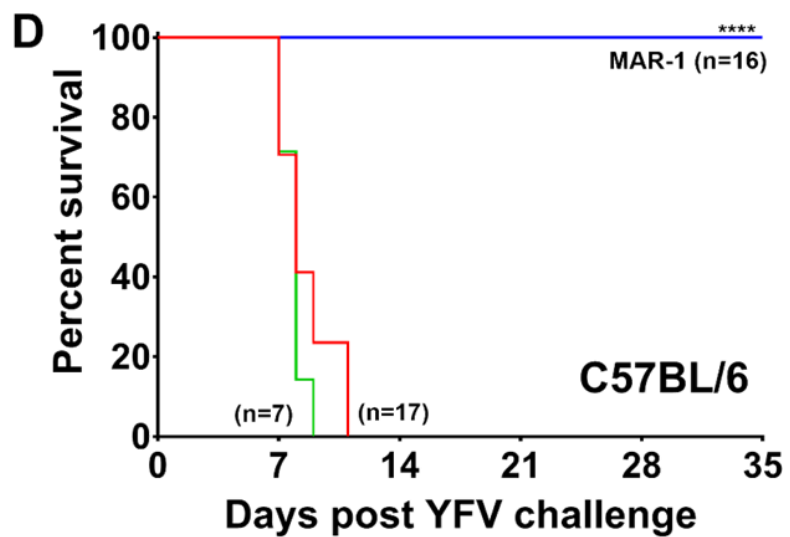

**FIG 1**



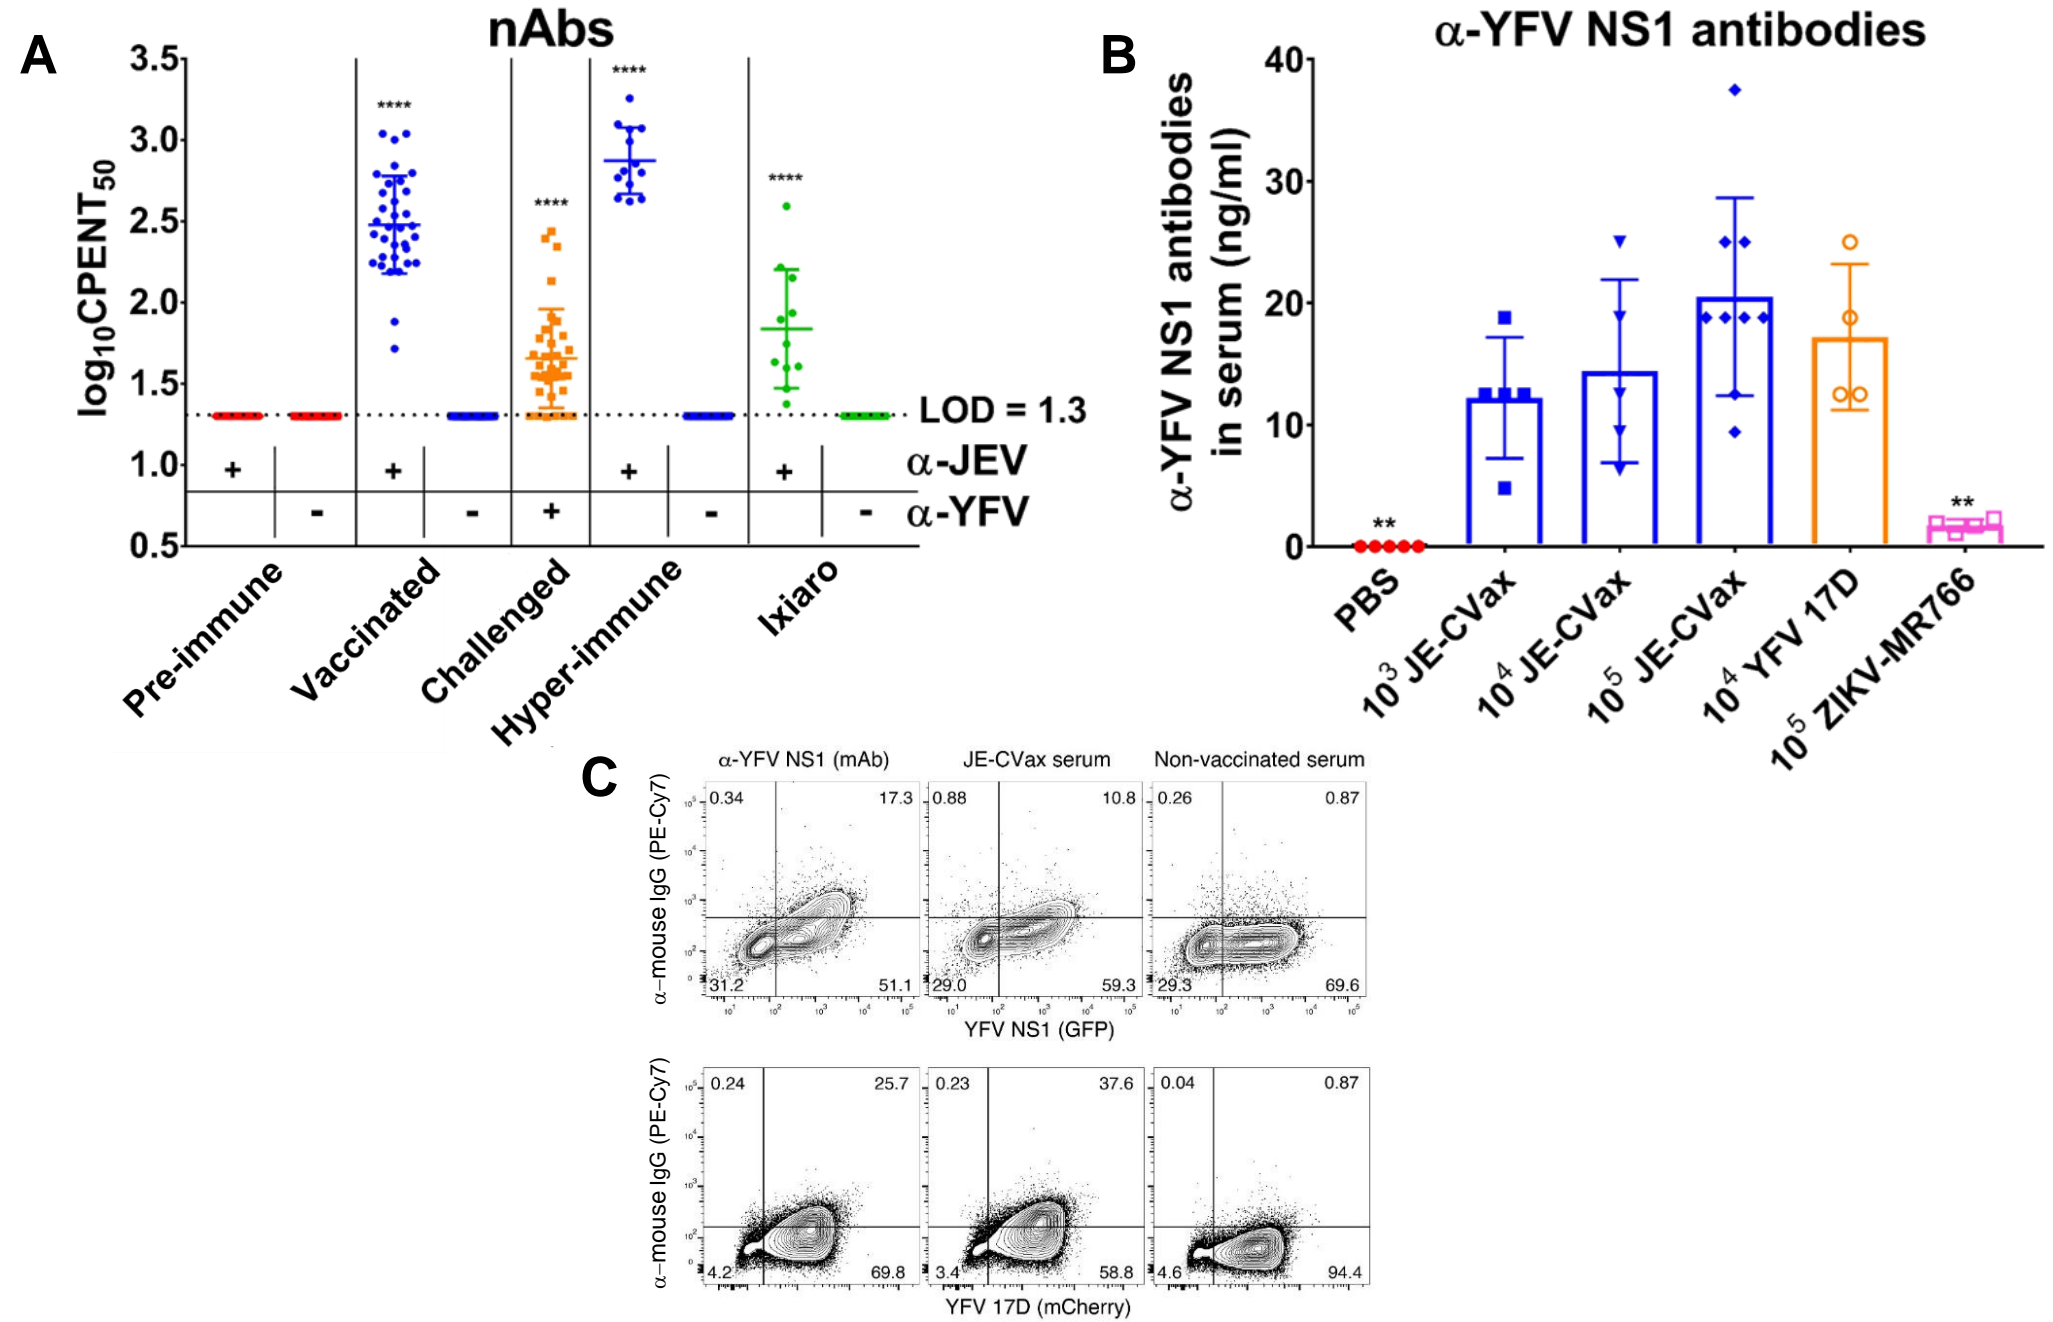

**FIG 2**



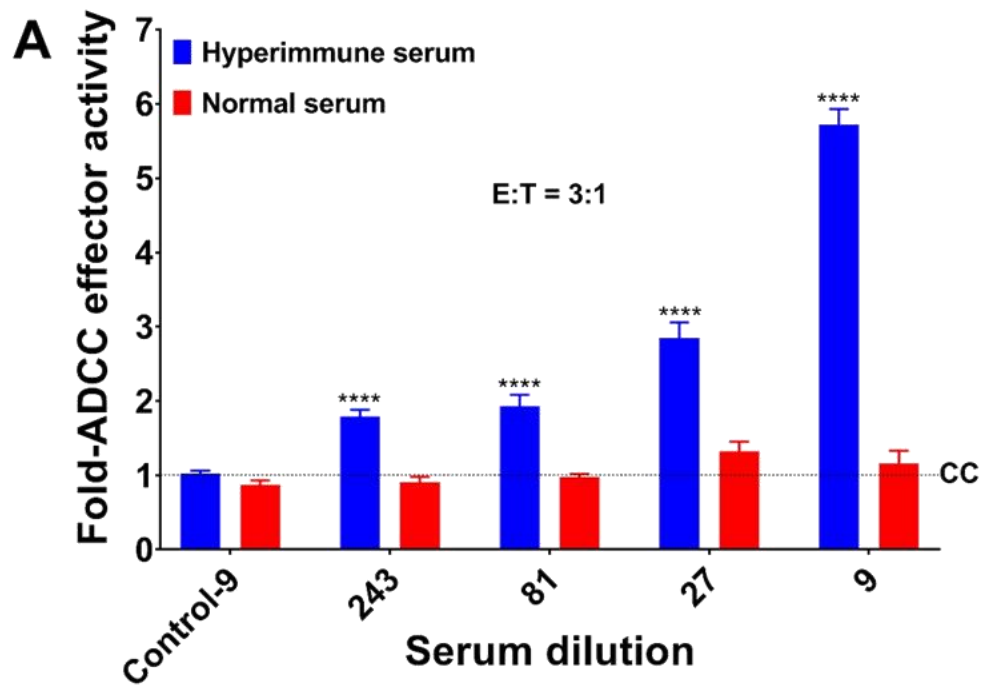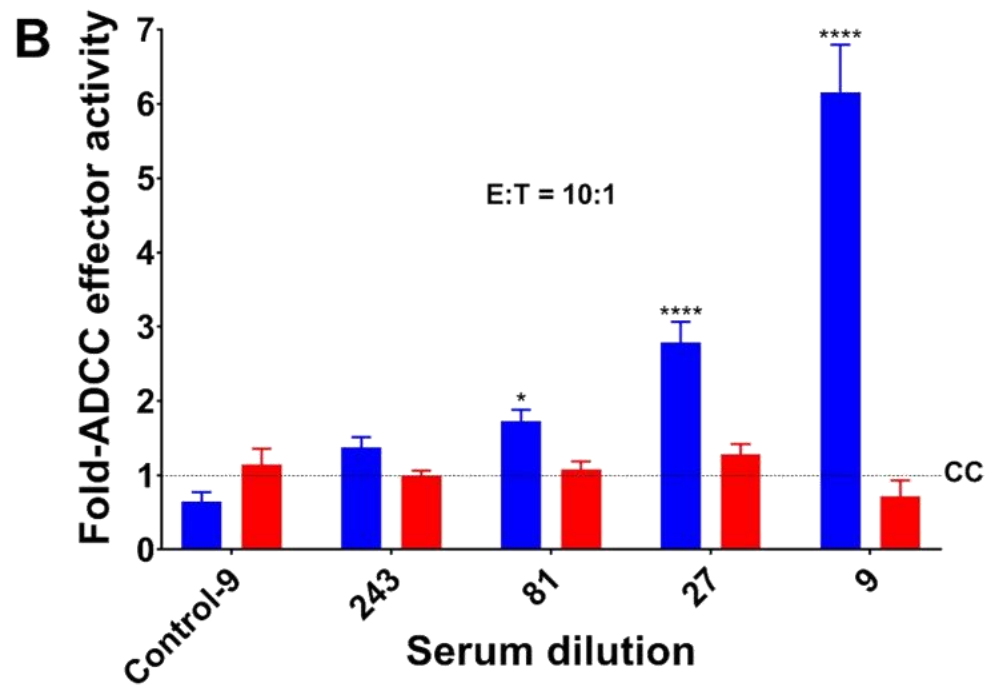

**FIG 3**

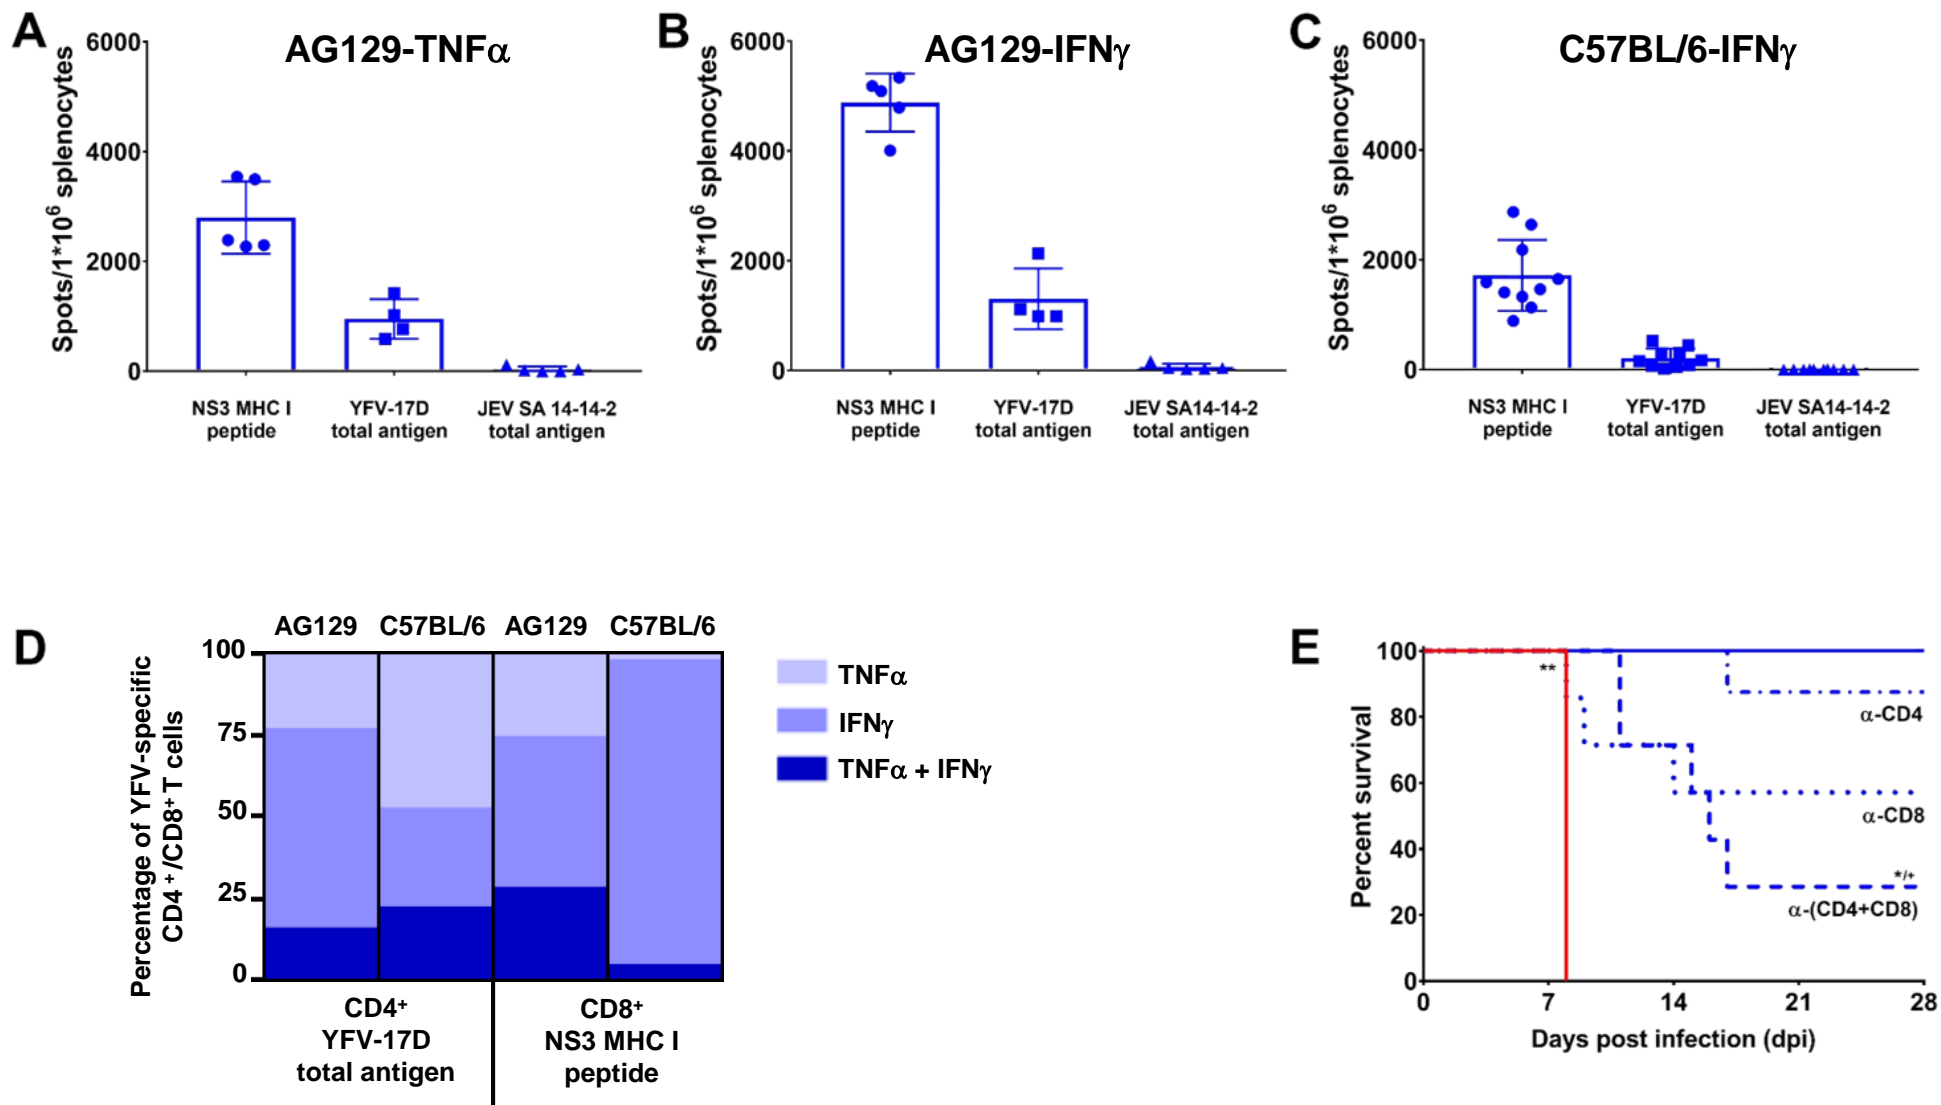

**FIG 4**

## **SUPPLEMENTAL MATERIAL**

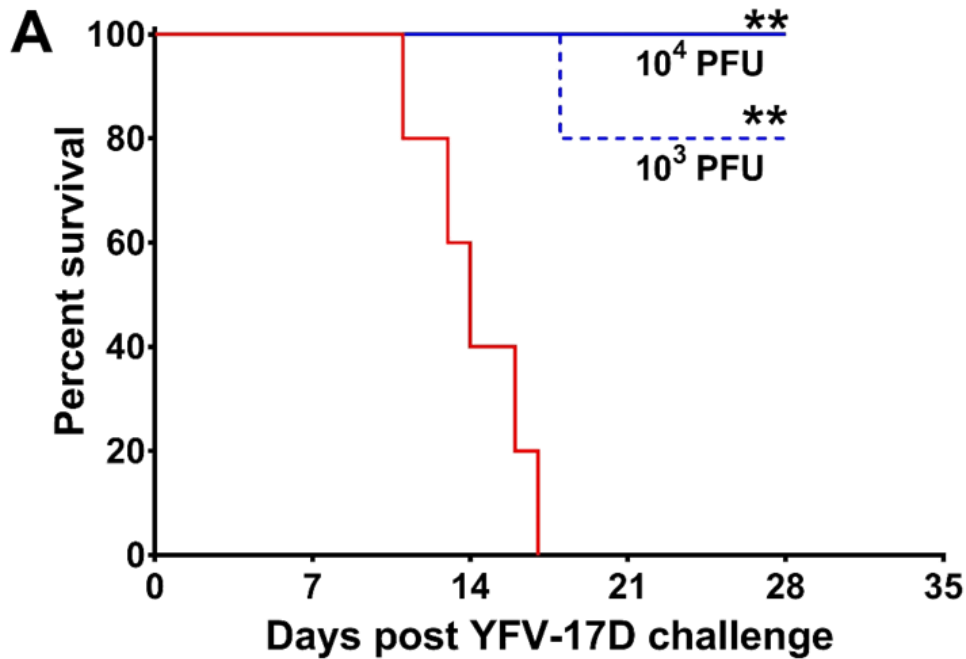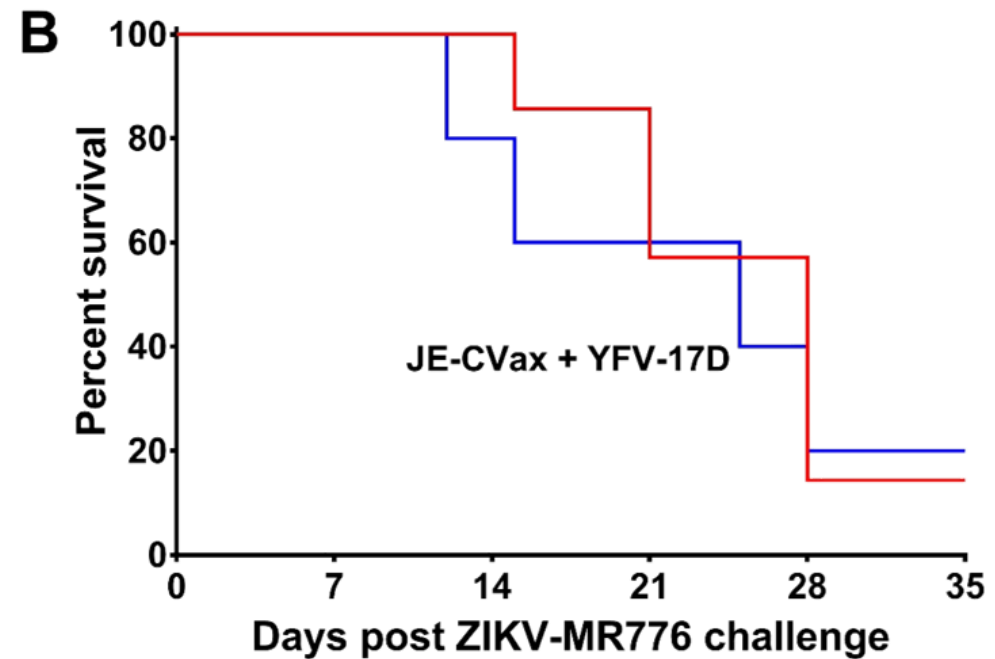

**FIG S1** *In vivo* characterization of protective efficacy of JE-CVax vaccination against lethal YFV-17D and ZIKV-MR766 challenge in AG129 mice. **(A)** AG129 mice ( $n = 5$ ) were vaccinated i.p. with  $10^{3-4}$  PFU of JE-CVax (blue) and 28 dpv, challenged i.p. with  $10^3$  PFU of YFV-17D. **(B)** AG129 mice ( $n = 6$ ) were first vaccinated i.p. with  $10^4$  PFU JE-CVax and 28 dpv challenged i.p. with  $10^3$  PFU YFV-17D (blue). 28 days post YFV-17D challenge animals were challenged a second time, yet with  $10^4$  PFU ZIKV-MR766 and observed for mortality for the following 5 weeks. Age-matched non-vaccinated (red) animals were challenged with  $10^3$  PFU YFV-17D [ $n = 5$  **(A)**] or  $10^4$  PFU ZIKA-MR766 [ $n = 7$  **(B)**] as controls. Log-rank (Mantel-Cox) survival analysis test was performed for statistical significance. \*\*  $p$ -value  $\leq 0.01$  compared to non-vaccinated group.

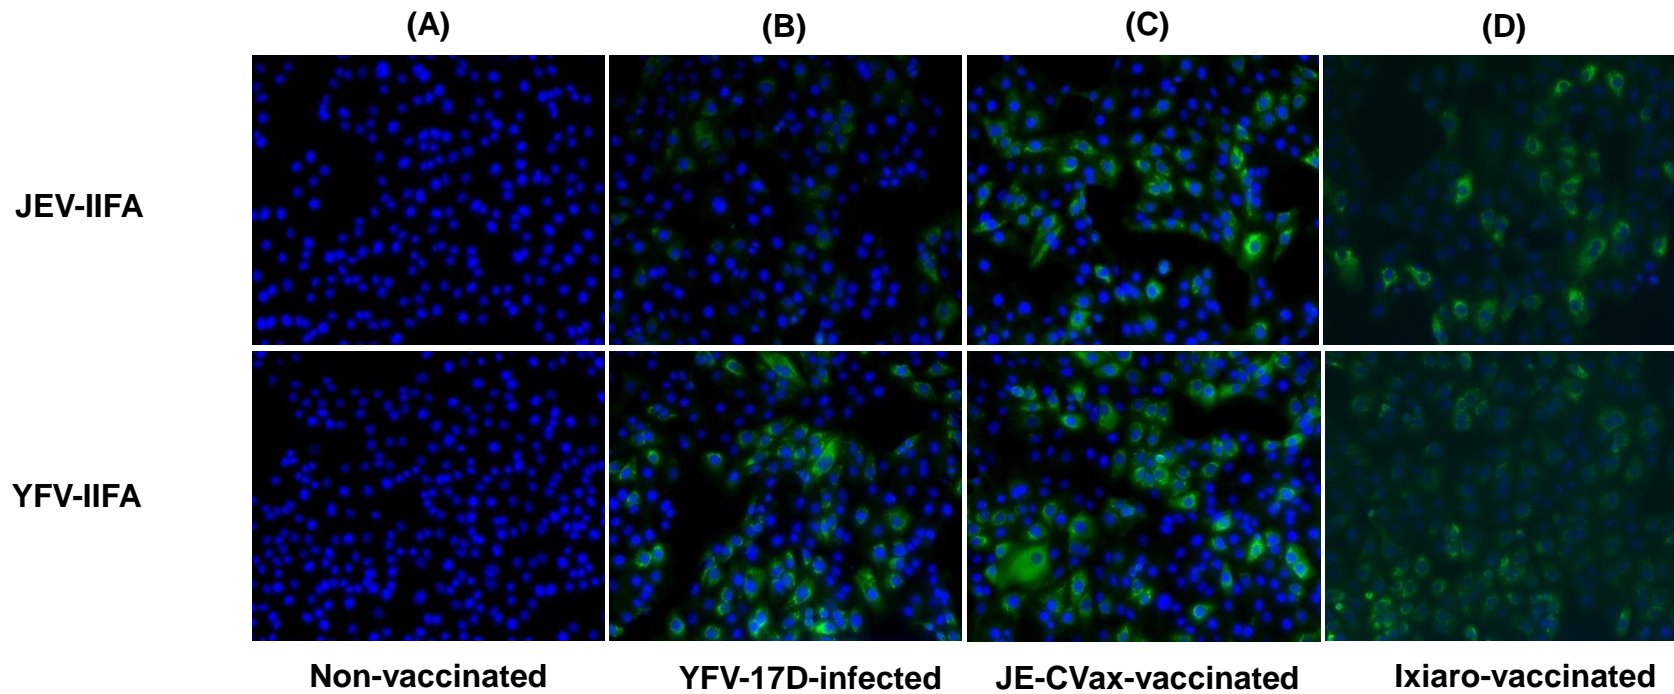

**FIG S2** Detection of cross-reactive antibodies in sera of YFV-17D-infected and JE-CVax-vaccinated mouse serum against JEV and YFV. AG129 mice were pre-bled before either infection with  $10^3$  PFU YFV-17D or vaccination with  $10^4$  PFU JE-CVax/Ixiaro and bled again either at the onset of sickness (YFV-17D) or on 28 dpv (JE-CVax). Preserum **(A)**, serum of YFV-17D infected mice **(B)**, serum of JE-CVax-vaccinated mice **(B)** and serum of Ixiaro-vaccinated mice **(D)** were analyzed by both JEV (upper panel) and YFV (lower panel) indirect immunofluorescence assay (IIFA, Euroimmun®) at 20X magnification.

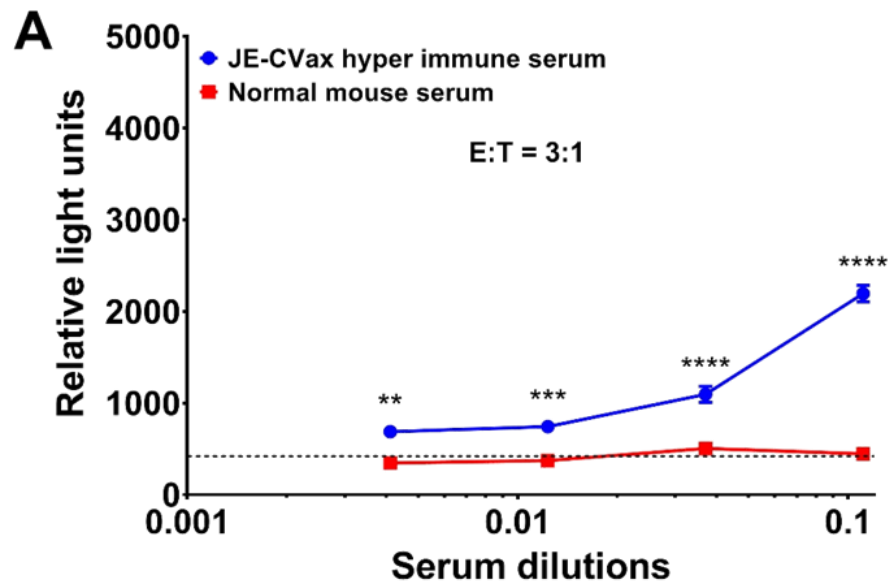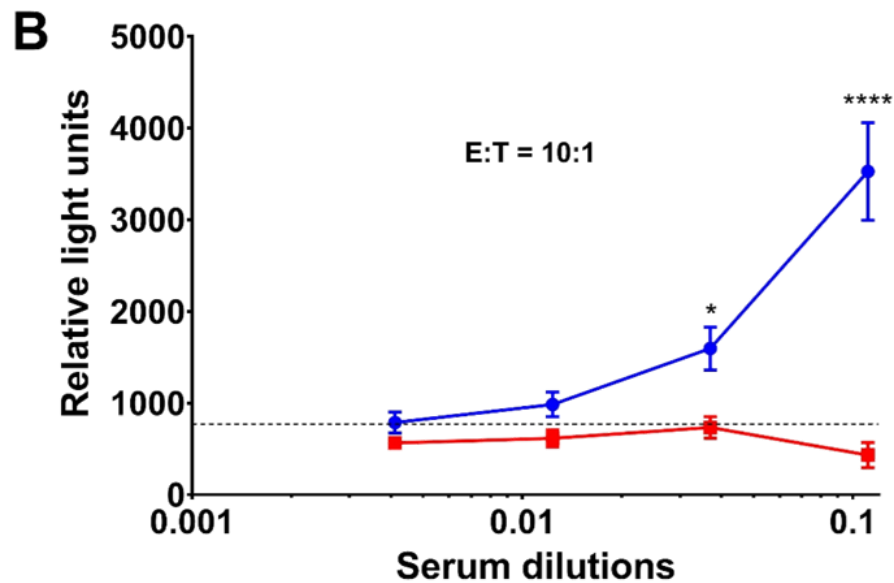

**FIG S3** Effect of JE-CVax hyperimmune serum in antibody-dependent cellular cytotoxicity (ADCC). JE-CVax hyperimmune serum (—●—) was tested for its ability to mediate ADCC activity in comparison to serum of non-vaccinated mice (—■—); at 3:1 (**A**) and 10:1 (**B**) effector (E): target (T) ratios. Data presented are from experiments conducted twice, each in triplicate, and presented as mean  $\pm$  SEM. The average of relative light unit signal plus three standard deviations from E:T in absence of hyperimmune serum was considered as the background signal (CC). Statistical significance was determined using two-way ANOVA analysis. \*, \*\*, \*\*\*, \*\*\*\* p-value  $\leq 0.05$ ,  $\leq 0.01$ ,  $\leq 0.001$  and  $\leq 0.0001$  compared to normal serum.

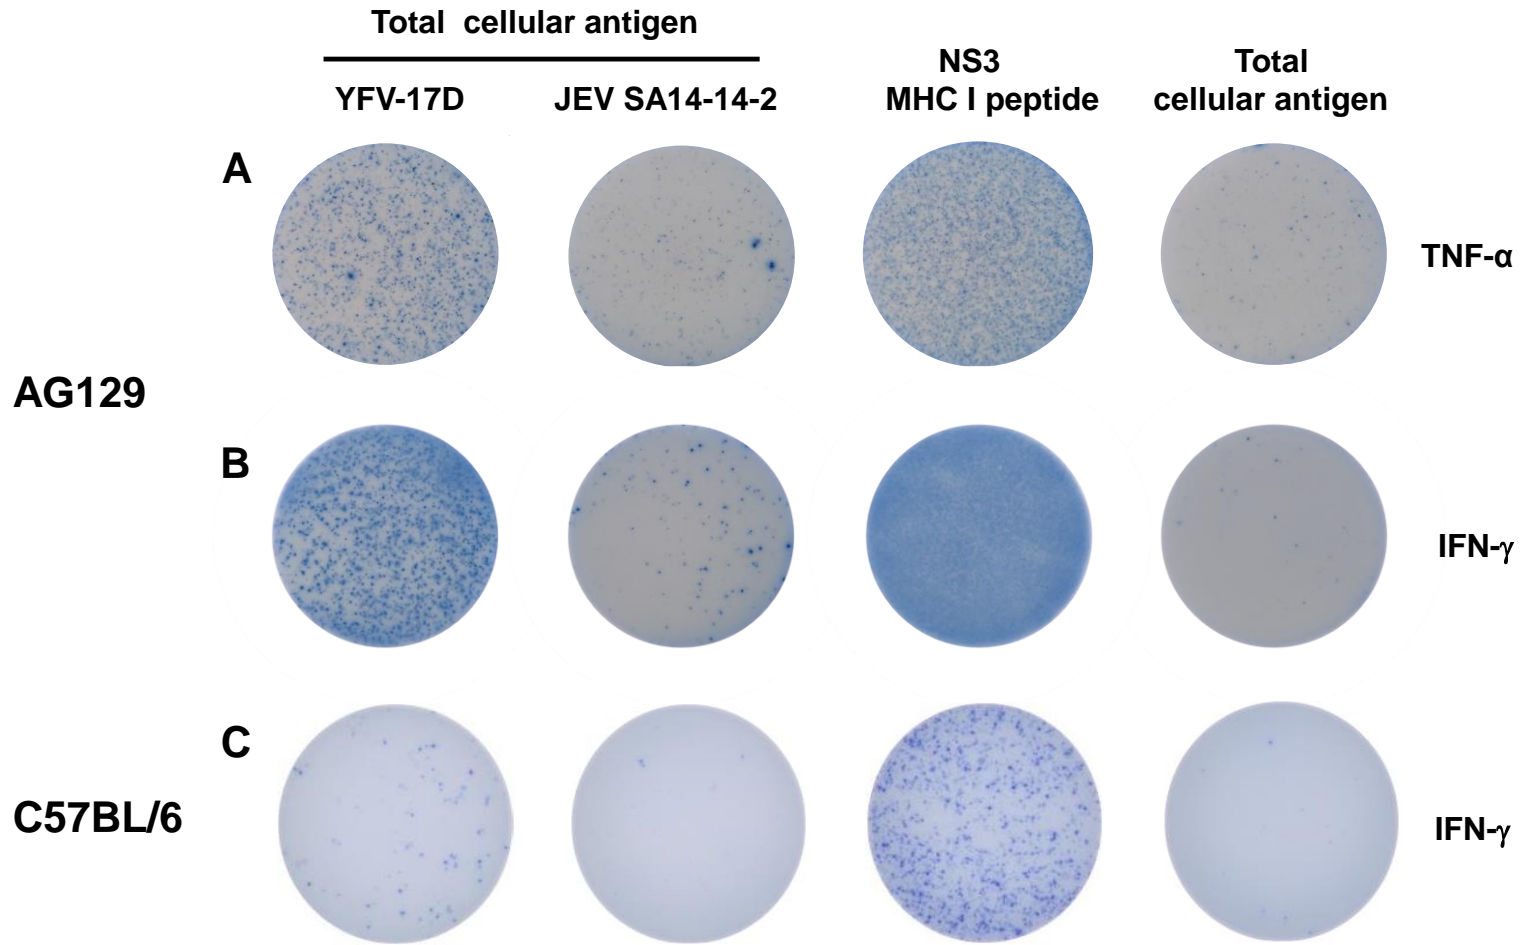

**FIG S4** T cell responses directed against YFV or JEV antigens in ELISpot assay. Representative wells of ELISpot assays showing TNF- $\alpha$  (**A**) and IFN- $\gamma$  (**B**, **C**) production by splenocytes of AG129 mice (**A**, **B**) and C57BL/6 mice (**C**), at 18- and 4-weeks, respectively, post-vaccination with  $10^4$  PFU JE-CVax, following 16 h *ex vivo* re-stimulation with a MHC class I restricted peptide derived from YFV NS3<sup>32</sup>, or the lysate of YFV-17D- or JEV SA14-14-2-infected Vero E6 cells. Stimulation using lysate of non-infected Vero E6 cells served as negative control.

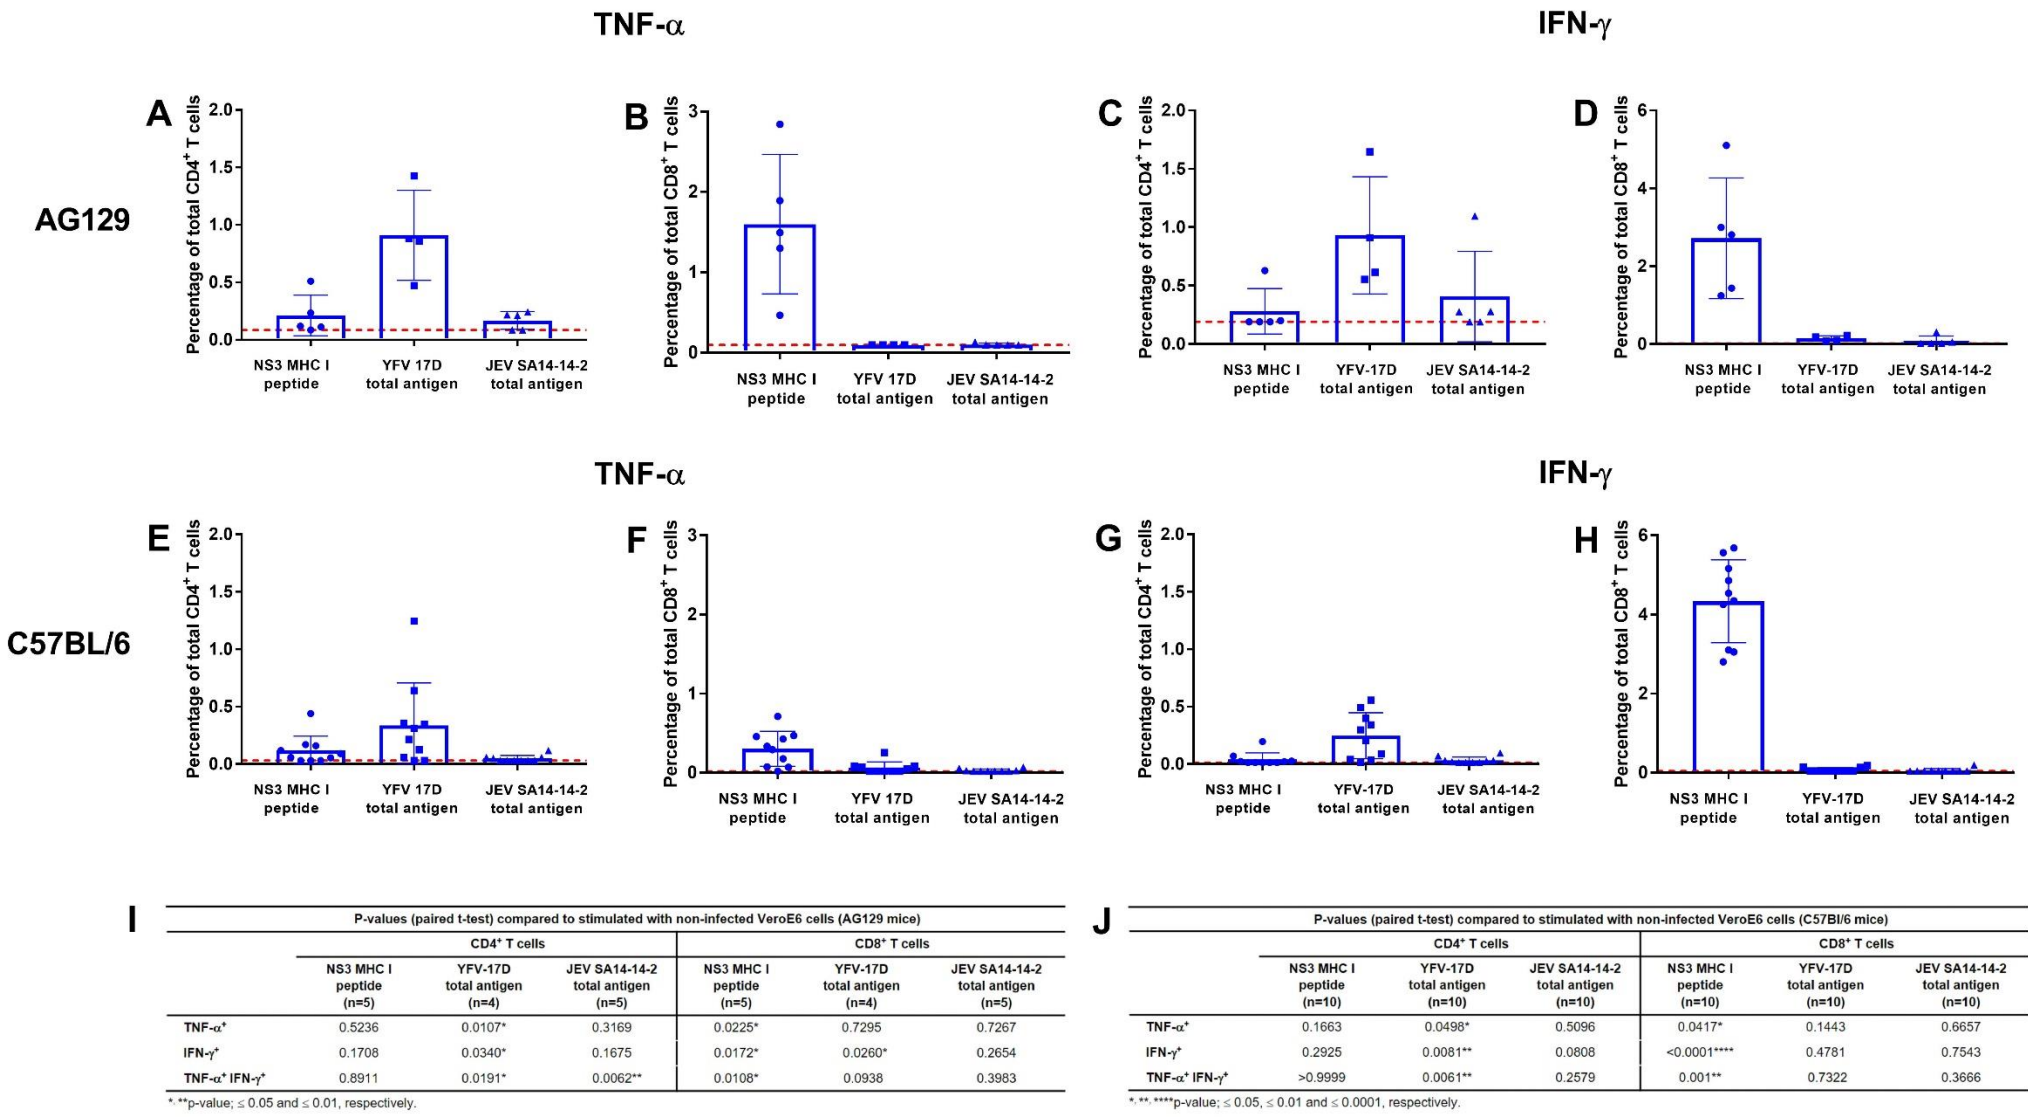

**FIG S5** Detection of T cell responses in mice by intracellular staining for TNF- $\alpha$  and IFN- $\gamma$  using flow cytometry. Flow cytometric analysis for intracellular TNF- $\alpha$  (**A**, **B**, **E**, **F**) and IFN- $\gamma$  (**C**, **D**, **G**, **H**) production by (**A**, **C**, **E**, **G**) CD4<sup>+</sup> or (**B**, **D**, **F**, **H**) CD8<sup>+</sup> T cells from vaccinated AG129 mice (**A-D**) and C57BL/6 mice (**E-H**) following stimulation with either NS3 MHC I peptide or cell lysate of YFV-17D or JEV SA14-14-2 infected VeroE6 cells. Percentage of total CD4<sup>+</sup> or CD8<sup>+</sup> TNF- $\alpha$  or IFN- $\gamma$  secreting T cells analyzed in flow cytometric analysis in AG129 mice (n = 5) and C57BL/6 mice (n = 10). **Table I and J** represents p-values between cytokine-secreting populations of antigen- versus non-infected VeroE6-stimulated samples. (Statistical significance; paired t-test) of flow cytometric analysis for splenocytes from AG129 and C57BL/6 mice, respectively. The data were compiled from two independent experiments and dotted lines represent average background in control samples collected from non-vaccinated animals.



## AG129 mice

Vaccinated

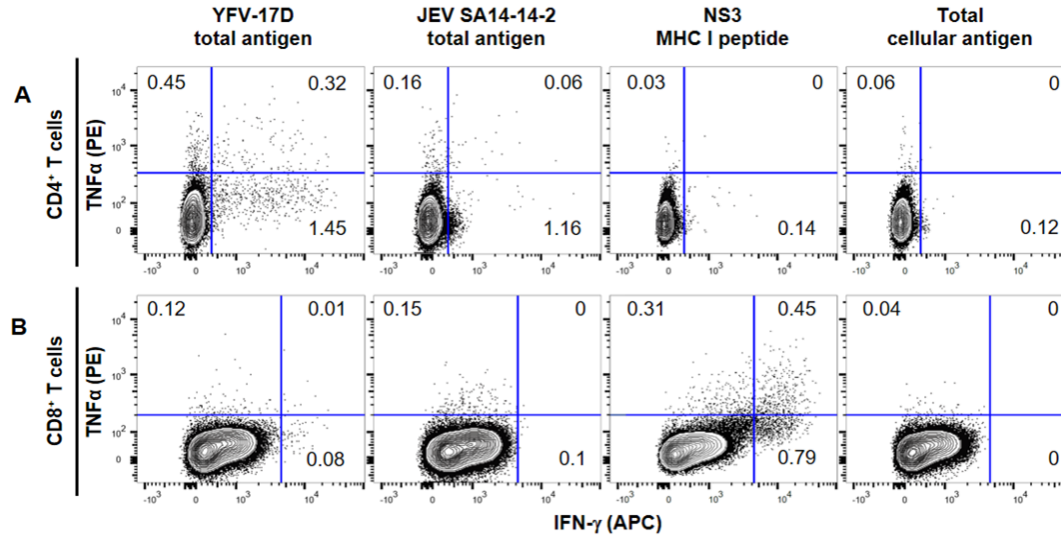

## C57BL/6 mice

Vaccinated

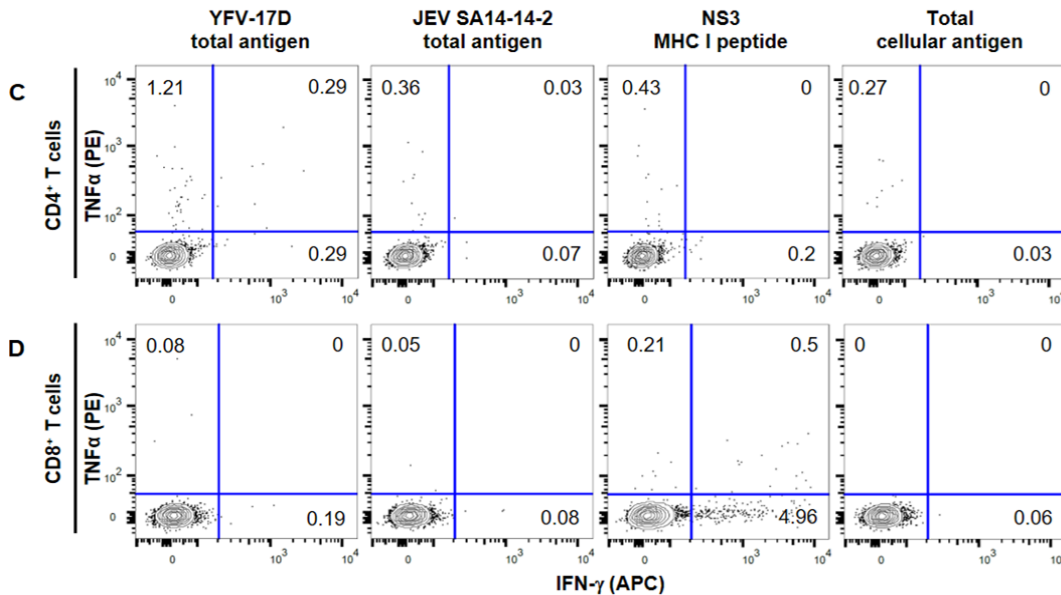

**FIG S6** Detection of T cell responses through intracellular cytokine staining in AG129 and C57BL/6 mice. Representative depiction of flow cytometric analysis for intracellular TNF- $\alpha$  and IFN- $\gamma$  production by **(A, C)** CD4<sup>+</sup> (gated CD3<sup>+</sup> CD8<sup>-</sup>) or **(B,D)** CD8<sup>+</sup> T cells (gated CD3<sup>+</sup> CD8<sup>+</sup>) from JE-CVax-vaccinated **(A, B)** AG129 mice, 18 weeks post-vaccination and **(C, D)** C57BL/6 mice, 4 weeks post-vaccination, following 16h *ex vivo* stimulation with cell lysate of YFV-17D or JEV SA14-14-2 infected Vero E6 cells, a MHC I restricted NS3 peptide, or uninfected Vero E6 cells.

## AG129 mice

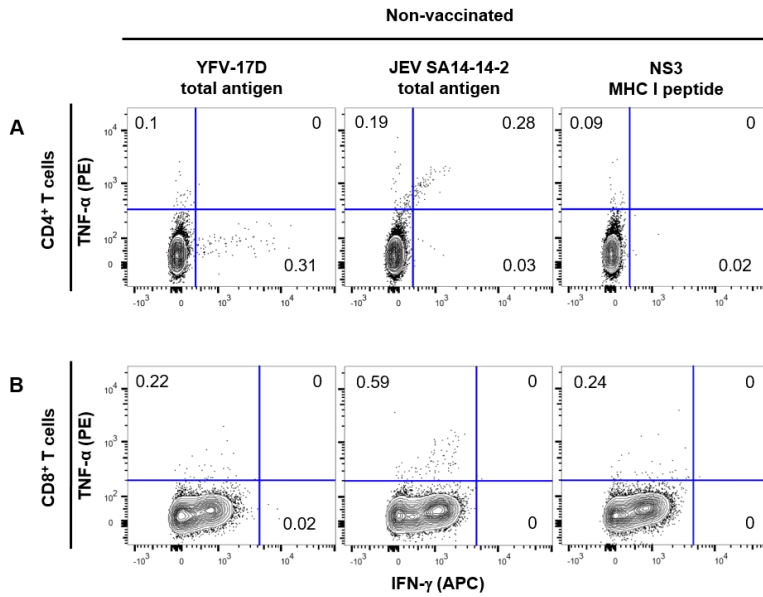

## C57BL/6 mice

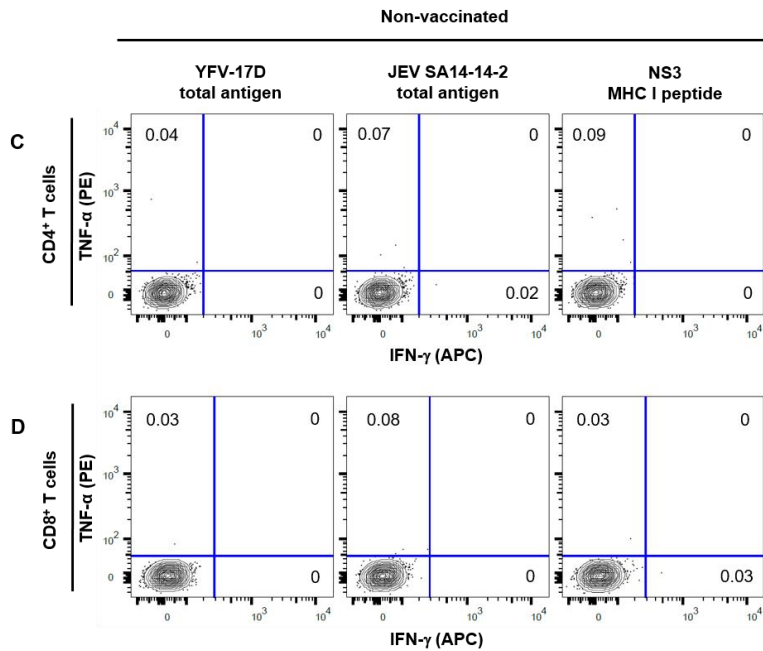

**FIG S7** Detection of T cell responses through intracellular cytokine staining in non-vaccinated baseline AG129 and C57BL/6 mice controls. Representative depiction of flow cytometric analysis for intracellular TNF- $\alpha$  and IFN- $\gamma$  production by **(A, C)** CD4<sup>+</sup> (gated CD3<sup>+</sup> CD8<sup>-</sup>) or **(B, D)** CD8<sup>+</sup> T cells (gated CD3<sup>+</sup> CD8<sup>+</sup>) from non-vaccinated AG129 mice following 16h *ex vivo* stimulation with cell lysates of YFV-17D or JEV SA14-14-2 infected Vero E6 cells, or a MHC I restricted YFV NS3 peptide.

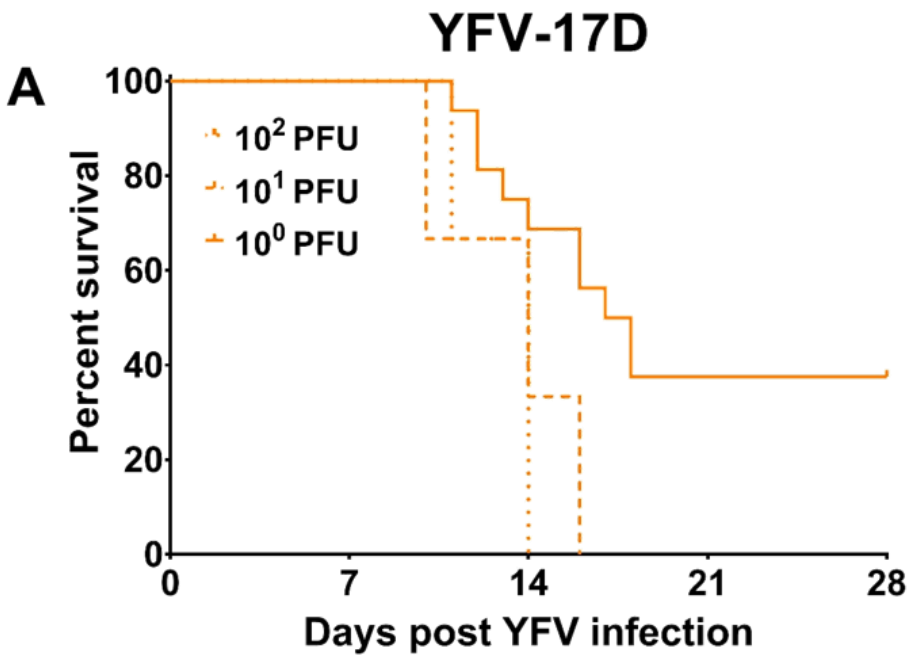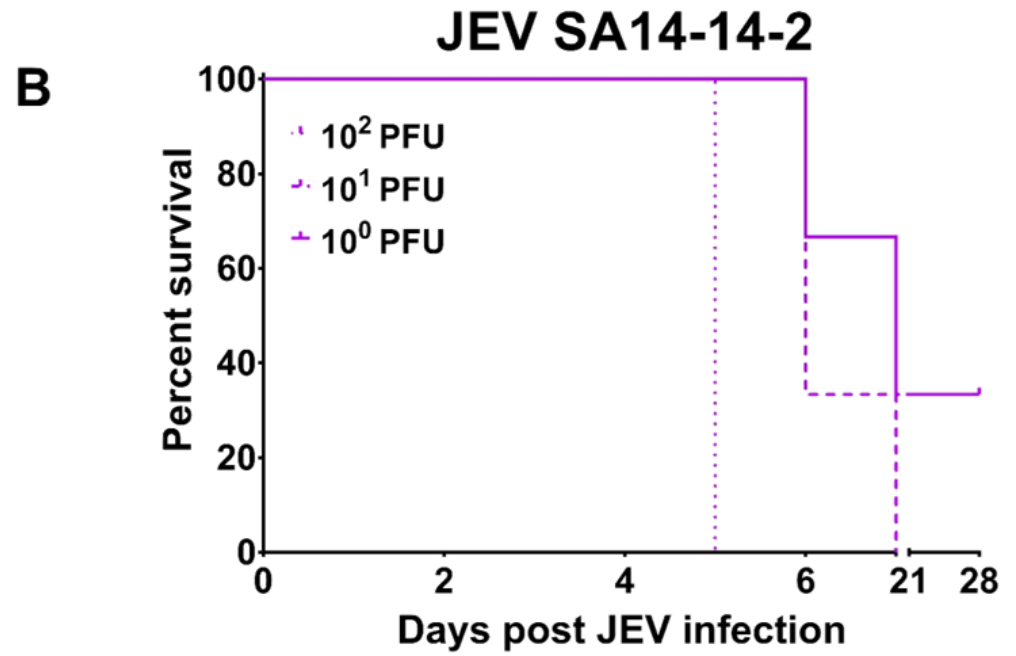

**FIG S8** *In vivo* infectivity of YFV-17D and JEV SA14-14-2 in AG129 mice. AG129 mice were inoculated via the i.p. route with different doses of **(A)** YFV-17D [ $10^0$  (—; n = 16),  $10^1$  (---; n = 3) or  $10^2$  PFU (.....; n = 3)], or **(B)** JEV SA14-14-2 [ $10^0$  (—),  $10^1$  (---) or  $10^2$  PFU (.....), n = 3]. Animals were monitored over a period of five weeks and were euthanized when humane end-points were reached.

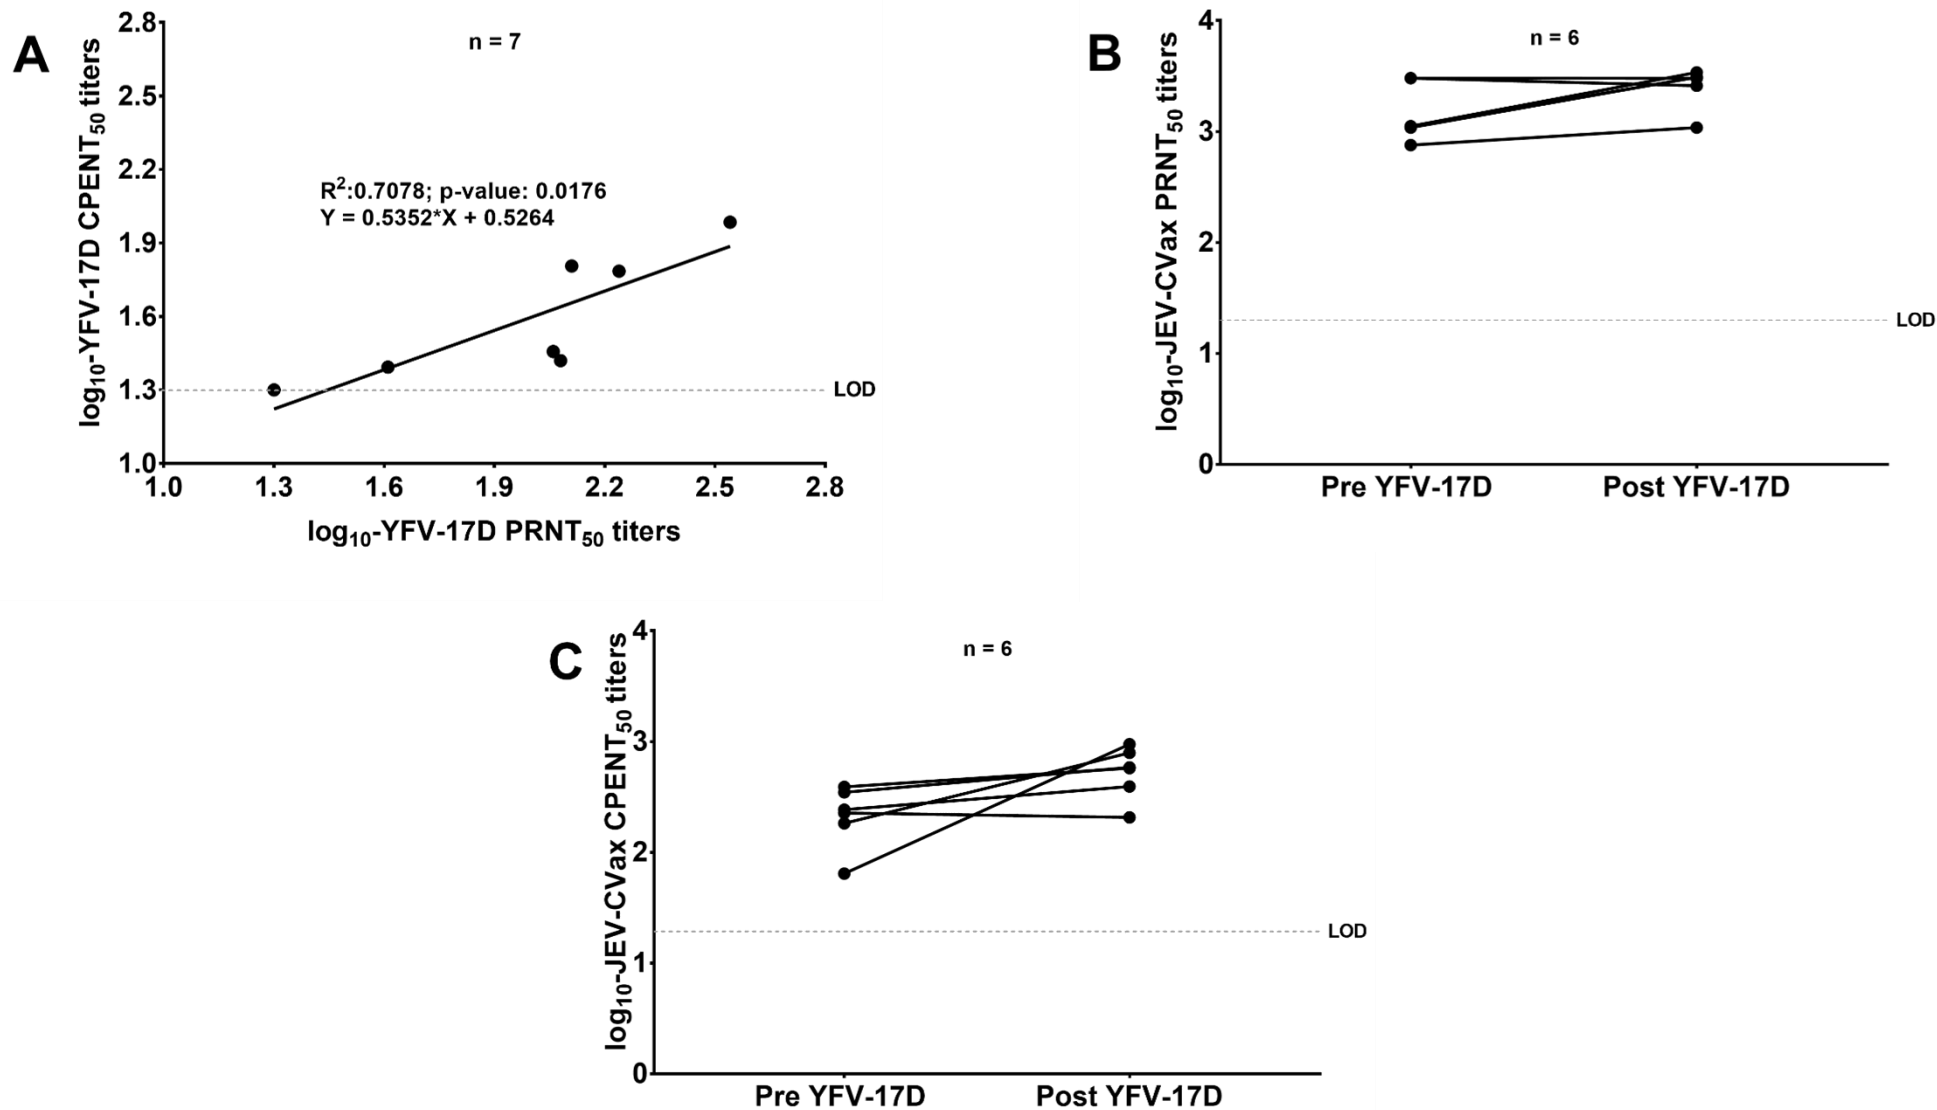

**FIG S9** Correlation of nAb titers determined as  $\log_{10}\text{PRNT}_{50}$  and  $\log_{10}\text{CPENT}_{50}$  in matched serum samples of JE-CVax-vaccinated and/or YFV-17D-challenged mice. AG129 mice ( $n = 7$ ) were vaccinated with  $10^4$  PFU of JE-CVax and 28 dpv challenged with  $10^3$  PFU YFV-17D. Serum was harvested and neutralization assays i.e. CPENT and PRNT were performed as described in Materials and Methods. Data presented show a good correlation (Pearson correlation:  $R^2 = 0.7071$ ;  $p = 0.02$ ) between  $\log_{10}\text{-YFV PRNT}_{50}$  and  $\log_{10}\text{-YFV CPENT}_{50}$  of matched samples (**A**). There was no marked increase in the  $\log_{10}\text{-JEV-CVax PRNT}_{50}$  and  $\log_{10}\text{-JEV-CVax CPENT}_{50}$  titers ( $p\text{-value}$ ; 0.156 and 0.062, respectively) when comparing matched serum samples from before and after challenge with YFV-17D using Wilcoxon matched pairs signed rank test (**B, C**). Limit of detection for either assay was  $\log_{10}20$  i.e. 1.3.

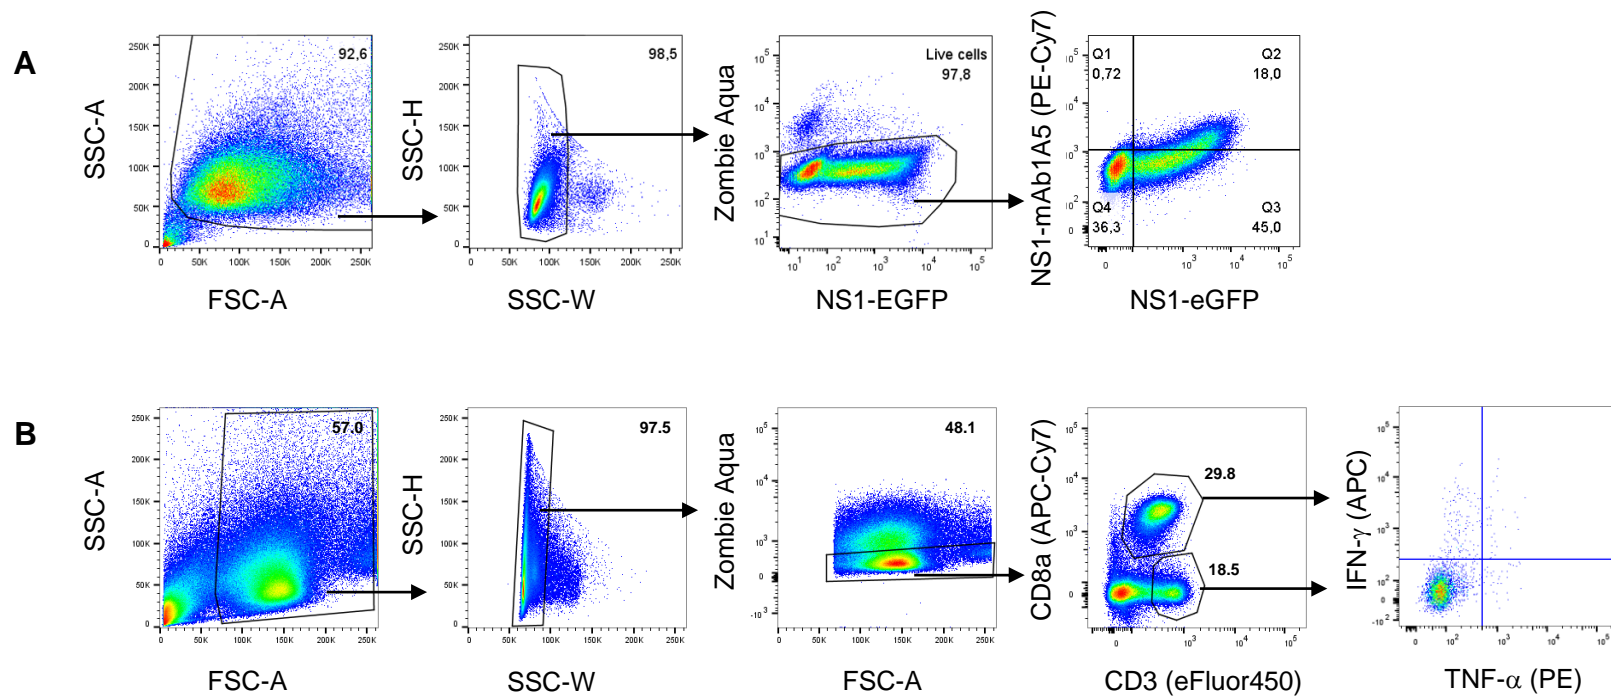

**FIG S10** Gating strategy for flow cytometry analysis. **(A, B)** Exclusion of debris was achieved by gating out the FSC-low population in a FSC-A vs SSC-A plot. Then, only single cells were retained by elimination of the high SSC-W population, in a SSC-W vs SSC-H plot. In a subsequent step, live cells were selected by gating out the Zombie Aqua-positive population as shown here in an NS1-eGFP/FSC-A vs ZA plot. Finally for the detection of anti-NS1 antibodies **(A)** cells were gated based on positivity for NS1-eGFP and positivity/negativity of  $\alpha$ -NS1 Ab PE-Cy7. **(B)** For intracellular cytokine staining, based on positivity for CD3e (eFluor450-conjugated) and negativity (CD4) or positivity for CD8a (APC/Cy7-conjugated), CD4<sup>+</sup> and CD8<sup>+</sup> T cell populations were defined as CD3<sup>+</sup>CD8<sup>-</sup> and CD3<sup>+</sup>CD8<sup>+</sup> populations, respectively. Finally, cells were gated based on positivity/negativity for IFN- $\gamma$  and positivity/negativity of TNF- $\alpha$ . Samples from non-vaccinated mice were used to set the boundaries that define cells positive and negative for intracellular markers.
